# Supplementary material
Source: publisher site journal article supplement (https://www.dovepress.com/article/393192)
Supplement: Supplementary file 1 [file get_supplementary_file.php]

Supplementary Table S1. Association between the clustering of the *Mycobacterium tuberculosis* isolates based on spoligotyping and demographic or drug-resistance profiles

| Characteristics     | Total N (%) | Clustered N (%) | Odds ratio (95% CI) | P-Value |
|---------------------|-------------|-----------------|---------------------|---------|
| Case types          |             |                 |                     |         |
| new patients        | 170(49.0)   | 151(88.8)       | Reference           | -       |
| relapsed patients   | 177(51.0)   | 162(91.5)       | 1.36(0.67-2.77)     | 0.399   |
| Age group (yrs)     |             |                 |                     |         |
| ≤30                 | 74(21.3)    | 68(91.9)        | Reference           | -       |
| 30-59               | 119(34.3)   | 102(85.7)       | 0.53 (0.20-1.41)    | 0.203   |
| ≥60                 | 154(44.4)   | 143(92.9)       | 1.15(0.41-3.23)     | 0.795   |
| Sex                 |             |                 |                     |         |
| female              | 186(53.6)   | 167(89.8)       | Reference           | -       |
| male                | 161(46.4)   | 146(90.7)       | 1.11 (0.54-2.26)    | 0.779   |
| Region              |             |                 |                     |         |
| Akesu               | 154(44.4)   | 142(92.2)       | Reference           | -       |
| Kashgar             | 93(26.8)    | 83(89.2)        | 0.70(0.29-1.69)     | 0.431   |
| Hetian              | 67(19.3)    | 62(92.5)        | 1.05(0.35-3.10)     | 0.933   |
| <sup>a</sup> Others | 33(9.5)     | 26(78.8)        | 0.31(0.11-0.87)     | 0.026   |
| Drug resistance     |             |                 |                     |         |
| Pan-sus             | 178(59.5)   | 158(88.8)       | Reference           | -       |
| INH <sup>mr</sup>   | 31(10.4)    | 29(93.5)        | 1.84(0.41-8.28)     | 1.835   |
| RMP <sup>mr</sup>   | 3(1.0)      | 2(66.7)         | 0.25(0.22-2.92)     | 0.271   |
| STR <sup>mr</sup>   | 13(4.3)     | 13(100.0)       | -                   | -       |
| MDR                 | 51(17.1)    | 48(94.1)        | 2.03(0.58-7.11)     | 0.271   |
| PDR                 | 23(7.7)     | 20(87.0)        | 0.84(0.23-3.10)     | 0.798   |
| INH resistance      |             |                 |                     |         |
| No                  | 202(67.3)   | 179(88.6)       | Reference           | -       |

|                |           |           |                  |       |
|----------------|-----------|-----------|------------------|-------|
| Yes            | 98(32.7)  | 92(93.9)  | 1.97(0.78-5.01)  | 0.154 |
| RMP resistance |           |           |                  |       |
| No             | 239(79.7) | 216(90.4) | Reference        | -     |
| Yes            | 61(20.3)  | 55(90.2)  | 0.98(0.38-2.51)  | 0.960 |
| STR resistance |           |           |                  |       |
| No             | 262(75.5) | 65(24.8)  | Reference        | -     |
| Yes            | 85(24.5)  | 28(32.9)  | 1.11(0.43-2.86)  | 0.823 |
| EMB resistance |           |           |                  |       |
| No             | 274(91.3) | 246(89.8) | Reference        | -     |
| Yes            | 26(8.7)   | 25(96.2)  | 2.85(0.37-21.81) | 0.314 |

Notes: <sup>mr</sup>mono-resistance; MDR, multi-drug resistance, means that the isolates were resistant to at least isoniazid and rifampicin; PDR, the isolates were resistant to more than one drug but not MDR; Pan-sus means that the isolates were susceptible to isoniazid, rifampicin, ethambutol and streptomycin; <sup>a</sup>other areas, include Kizilsu Kirgiz Autonomous Prefecture and Bayingolin Mongol Autonomous Prefecture. Numbers in bold mean that  $P < 0.05$ .

Supplementary figures

Supplementary Figure S1. Dendrogram based on spoligotyping data of *Mycobacterium tuberculosis* isolates obtained from southern Xinjiang, China

Note: Abbreviations in the TYPE column: repl, relapsed patients; in the Susceptibility column: ND, not detected; H, isoniazid; R, rifampicin; S, streptomycin; E, ethambutol;

Pan-sus, simultaneously susceptible to H, R, S, E.

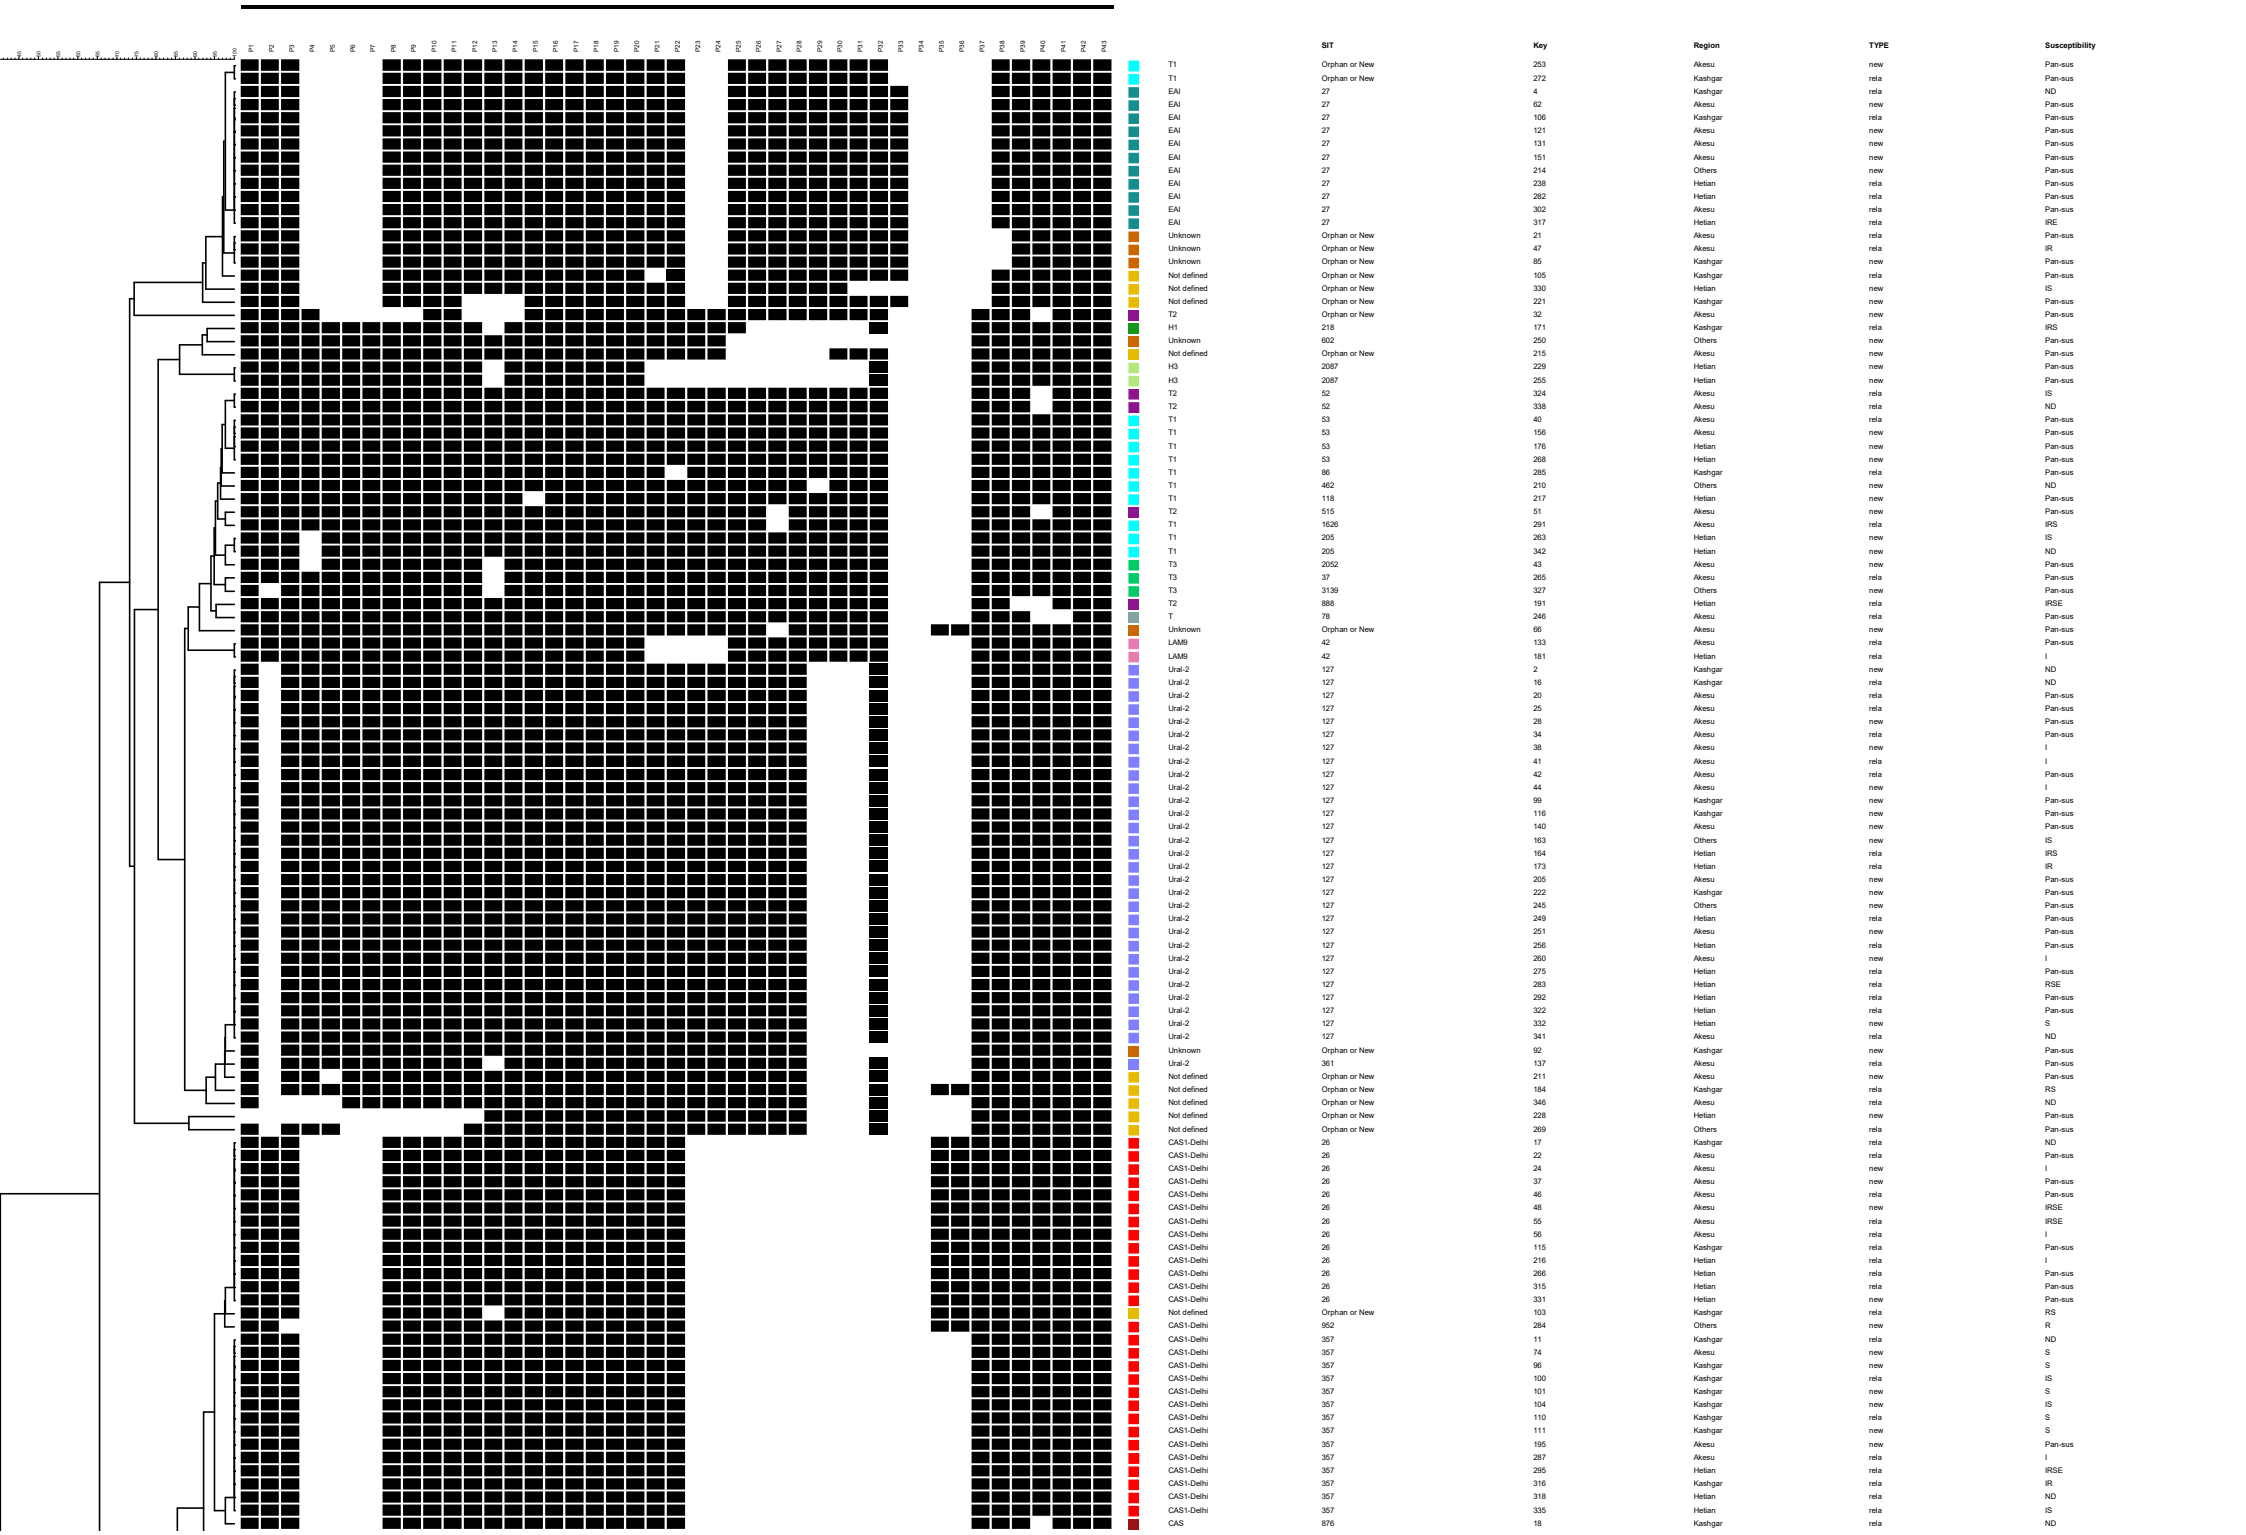



|         |      |         |         |         |         |
|---------|------|---------|---------|---------|---------|
| Beijing | 1    | Helian  | rela    | IRS     |         |
| Beijing | 166  | Akesu   | rela    | IS      |         |
| Beijing | 169  | Akesu   | new     | IES     |         |
| Beijing | 170  | Akesu   | rela    | S       |         |
| Beijing | 172  | Helian  | rela    | IRE     |         |
| Beijing | 174  | Akesu   | new     | IRE     |         |
| Beijing | 175  | Helian  | rela    | I       |         |
| Beijing | 177  | Kashgar | new     | IR      |         |
| Beijing | 178  | Kashgar | new     | Pan-sus |         |
| Beijing | 179  | Helian  | rela    | RS      |         |
| Beijing | 180  | Kashgar | rela    | Pan-sus |         |
| Beijing | 183  | Others  | rela    | RS      |         |
| Beijing | 185  | Helian  | rela    | IRS     |         |
| Beijing | 188  | Others  | new     | IRSE    |         |
| Beijing | 187  | Kashgar | new     | ND      |         |
| Beijing | 188  | Kashgar | rela    | Pan-sus |         |
| Beijing | 189  | Akesu   | new     | I       |         |
| Beijing | 190  | Akesu   | new     | ND      |         |
| Beijing | 192  | Akesu   | new     | Pan-sus |         |
| Beijing | 193  | Kashgar | new     | S       |         |
| Beijing | 194  | Kashgar | new     | ND      |         |
| Beijing | 196  | Others  | rela    | ND      |         |
| Beijing | 197  | Kashgar | new     | IRS     |         |
| Beijing | 198  | Helian  | new     | Pan-sus |         |
| Beijing | 200  | Akesu   | new     | I       |         |
| Beijing | 201  | Kashgar | rela    | Pan-sus |         |
| Beijing | 202  | Helian  | rela    | Pan-sus |         |
| Beijing | 203  | Others  | rela    | Pan-sus |         |
| Beijing | 206  | Others  | new     | Pan-sus |         |
| Beijing | 207  | Akesu   | new     | IRSE    |         |
| Beijing | 208  | Others  | rela    | IRSE    |         |
| Beijing | 209  | Akesu   | new     | Pan-sus |         |
| Beijing | 212  | Akesu   | new     | Pan-sus |         |
| Beijing | 213  | Akesu   | new     | ND      |         |
| Beijing | 218  | Others  | new     | Pan-sus |         |
| Beijing | 219  | Akesu   | new     | Pan-sus |         |
| Beijing | 220  | Others  | new     | IRSE    |         |
| Beijing | 223  | Kashgar | new     | Pan-sus |         |
| Beijing | 224  | Akesu   | rela    | Pan-sus |         |
| Beijing | 225  | Others  | new     | Pan-sus |         |
| Beijing | 226  | Others  | new     | Pan-sus |         |
| Beijing | 232  | Others  | rela    | Pan-sus |         |
| Beijing | 234  | Akesu   | 1       | Pan-sus |         |
| Beijing | 235  | Helian  | new     | Pan-sus |         |
| Beijing | 236  | Helian  | rela    | IRS     |         |
| Beijing | 239  | Akesu   | new     | IRS     |         |
| Beijing | 240  | Helian  | new     | IRS     |         |
| Beijing | 241  | Kashgar | rela    | IR      |         |
| Beijing | 242  | Akesu   | rela    | Pan-sus |         |
| Beijing | 243  | Akesu   | rela    | Pan-sus |         |
| Beijing | 244  | Akesu   | rela    | Pan-sus |         |
| Beijing | 247  | Helian  | rela    | Pan-sus |         |
| Beijing | 248  | Akesu   | new     | IS      |         |
| Beijing | 252  | Akesu   | new     | Pan-sus |         |
| Beijing | 257  | Helian  | new     | I       |         |
| Beijing | 258  | Kashgar | new     | Pan-sus |         |
| Beijing | 259  | Others  | rela    | IRSE    |         |
| Beijing | 261  | Helian  | new     | S       |         |
| Beijing | 262  | Helian  | rela    | I       |         |
| Beijing | 264  | Helian  | rela    | R       |         |
| Beijing | 270  | Akesu   | new     | Pan-sus |         |
| Beijing | 271  | Helian  | rela    | Pan-sus |         |
| Beijing | 273  | Helian  | new     | S       |         |
| Beijing | 274  | Akesu   | rela    | Pan-sus |         |
| Beijing | 277  | Others  | new     | Pan-sus |         |
| Beijing | 279  | Helian  | new     | Pan-sus |         |
| Beijing | 280  | Others  | new     | Pan-sus |         |
| Beijing | 286  | Others  | new     | IRSE    |         |
| Beijing | 289  | Helian  | new     | Pan-sus |         |
| Beijing | 290  | Kashgar | rela    | IR      |         |
| Beijing | 293  | Helian  | rela    | IRS     |         |
| Beijing | 294  | Akesu   | rela    | IRS     |         |
| Beijing | 296  | Others  | rela    | IRSE    |         |
| Beijing | 297  | Akesu   | new     | IRSE    |         |
| Beijing | 299  | Helian  | rela    | IR      |         |
| Beijing | 300  | Others  | rela    | ND      |         |
| Beijing | 301  | Kashgar | rela    | ND      |         |
| Beijing | 303  | Akesu   | new     | R       |         |
| Beijing | 304  | Helian  | new     | Pan-sus |         |
| Beijing | 306  | Helian  | rela    | IR      |         |
| Beijing | 308  | Kashgar | rela    | ND      |         |
| Beijing | 309  | Helian  | rela    | ND      |         |
| Beijing | 310  | Others  | rela    | ND      |         |
| Beijing | 312  | Kashgar | rela    | ND      |         |
| Beijing | 313  | Helian  | rela    | IR      |         |
| Beijing | 314  | Kashgar | new     | Pan-sus |         |
| Beijing | 319  | Kashgar | rela    | IRE     |         |
| Beijing | 320  | Akesu   | new     | Pan-sus |         |
| Beijing | 323  | Akesu   | new     | Pan-sus |         |
| Beijing | 325  | Kashgar | rela    | Pan-sus |         |
| Beijing | 328  | Kashgar | new     | Pan-sus |         |
| Beijing | 333  | Helian  | new     | Pan-sus |         |
| Beijing | 334  | Helian  | rela    | RS      |         |
| Beijing | 336  | Others  | rela    | ND      |         |
| Beijing | 337  | Akesu   | new     | ND      |         |
| Beijing | 339  | Akesu   | rela    | ND      |         |
| Beijing | 340  | Helian  | new     | ND      |         |
| Beijing | 343  | Others  | rela    | ND      |         |
| Beijing | 344  | Akesu   | rela    | ND      |         |
| Beijing | 345  | Akesu   | rela    | ND      |         |
| Beijing | 347  | Kashgar | new     | Pan-sus |         |
| Beijing | 14   | Kashgar | rela    | ND      |         |
| Beijing | 68   | Akesu   | new     | IRS     |         |
| Beijing | 190  | Kashgar | rela    | I       |         |
| Beijing | 190  | Akesu   | new     | IRSE    |         |
| Beijing | 190  | Helian  | rela    | IS      |         |
| Beijing | 190  | Akesu   | rela    | ND      |         |
| Beijing | 205  | 9       | Kashgar | new     | ND      |
| Beijing | 209  | 10      | Kashgar | rela    | ND      |
| Beijing | 209  | 162     | Others  | rela    | ND      |
| Beijing | 1162 | 182     | Kashgar | rela    | IS      |
| Beijing | 1162 | 305     | Kashgar | rela    | IS      |
| Beijing | 260  | 227     | Helian  | new     | I       |
| Beijing | 1311 | 3       | Kashgar | rela    | IR      |
| Beijing | 1311 | 107     | Kashgar | new     | Pan-sus |

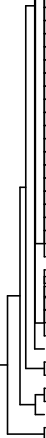

Supplementary Figure S2. Dendrogram based on VNTR-15<sub>China</sub> typing data of *Mycobacterium tuberculosis* isolates obtained from southern Xinjiang, China.

Note: Abbreviations in the TYPE column: rela, relapsed patients; in the Susceptibility column: ND, not detected; H, isoniazid; R, rifampicin; S, streptomycin; E, ethambutol; Pan-sus, simultaneously susceptible to H, R, S, E.





|   |   |   |   |   |   |   |   |   |   |   |   |   |   |    |     |         |      |         |      |         |
|---|---|---|---|---|---|---|---|---|---|---|---|---|---|----|-----|---------|------|---------|------|---------|
| 4 | 2 | 4 | 3 | 5 | 2 | 3 | 6 | 7 | 2 | 3 | 3 | 5 | 4 | 4  | 311 | Others  | rela | ND      | 1    | Beijing |
| 4 | 2 | 4 | 3 | 5 | 3 | 2 | 4 | 7 | 2 | 3 | 3 | 5 | 4 | 4  | 109 | Kashgar | rela | Pan-sus | 1    | Beijing |
| 4 | 2 | 4 | 3 | 5 | 3 | 2 | 4 | 6 | 2 | 3 | 3 | 5 | 4 | 4  | 308 | Kashgar | rela | ND      | 1    | Beijing |
| 4 | 2 | 4 | 3 | 5 | 3 | 2 | 5 | 7 | 3 | 2 | 3 | 4 | 3 | 4  | 98  | Kashgar | new  | S       | 1    | Beijing |
| 4 | 2 | 4 | 3 | 5 | 3 | 2 | 5 | 7 | 3 | 2 | 3 | 4 | 4 | 4  | 248 | Akesu   | new  | IS      | 1    | Beijing |
| 4 | 2 | 4 | 3 | 5 | 2 | 2 | 5 | 7 | 3 | 2 | 3 | 4 | 3 | 4  | 259 | Others  | rela | IRSE    | 1    | Beijing |
| 4 | 2 | 4 | 3 | 5 | 2 | 2 | 5 | 7 | 3 | 2 | 3 | 4 | 4 | 4  | 97  | Kashgar | new  | Pan-sus | 1    | Beijing |
| 4 | 2 | 4 | 3 | 5 | 2 | 2 | 5 | 7 | 3 | 2 | 3 | 4 | 4 | 4  | 139 | Akesu   | rela | Pan-sus | 1    | Beijing |
| 4 | 2 | 4 | 3 | 5 | 2 | 2 | 4 | 7 | 3 | 2 | 3 | 4 | 4 | 4  | 168 | Akesu   | rela | IS      | 1    | Beijing |
| 4 | 2 | 4 | 3 | 5 | 2 | 2 | 4 | 7 | 3 | 2 | 3 | 4 | 3 | 4  | 187 | Kashgar | new  | ND      | 1    | Beijing |
| 4 | 2 | 4 | 3 | 5 | 2 | 2 | 4 | 6 | 3 | 2 | 3 | 4 | 3 | 4  | 320 | Akesu   | new  | Pan-sus | 1    | Beijing |
| 4 | 2 | 4 | 3 | 5 | 2 | 2 | 4 | 7 | 2 | 2 | 3 | 4 | 3 | 4  | 189 | Akesu   | new  | I       | 1    | Beijing |
| 4 | 2 | 4 | 3 | 9 | 2 | 3 | 5 | 7 | 3 | 2 | 3 | 4 | 3 | 4  | 347 | Kashgar | new  | Pan-sus | 1    | Beijing |
| 4 | 2 | 4 | 3 | 5 | 2 | 2 | 4 | 6 | 3 | 3 | 3 | 4 | 4 | 7  | 200 | Akesu   | new  | I       | 1    | Beijing |
| 4 | 2 | 4 | 3 | 5 | 3 | 2 | 4 | 7 | 3 | 2 | 3 | 4 | 4 | 7  | 224 | Akesu   | rela | Pan-sus | 1    | Beijing |
| 4 | 2 | 4 | 3 | 5 | 2 | 3 | 4 | 7 | 3 | 2 | 3 | 4 | 4 | 4  | 198 | Hetian  | new  | Pan-sus | 1    | Beijing |
| 4 | 2 | 4 | 3 | 5 | 2 | 3 | 4 | 7 | 3 | 2 | 3 | 4 | 4 | 4  | 226 | Others  | new  | Pan-sus | 1    | Beijing |
| 4 | 2 | 4 | 3 | 5 | 2 | 3 | 4 | 7 | 3 | 2 | 3 | 4 | 4 | 4  | 64  | Akesu   | rela | Pan-sus | 1    | Beijing |
| 4 | 2 | 4 | 3 | 5 | 2 | 3 | 4 | 7 | 2 | 2 | 3 | 4 | 4 | 4  | 193 | Kashgar | new  | S       | 1    | Beijing |
| 4 | 2 | 4 | 3 | 5 | 2 | 3 | 4 | 7 | 3 | 3 | 3 | 4 | 3 | 4  | 180 | Kashgar | rela | Pan-sus | 1    | Beijing |
| 4 | 2 | 4 | 3 | 5 | 2 | 3 | 4 | 7 | 3 | 2 | 3 | 4 | 3 | 4  | 188 | Kashgar | rela | Pan-sus | 1    | Beijing |
| 4 | 2 | 4 | 3 | 5 | 3 | 3 | 4 | 7 | 3 | 2 | 3 | 4 | 4 | 4  | 213 | Akesu   | new  | ND      | 1    | Beijing |
| 4 | 2 | 4 | 3 | 5 | 3 | 3 | 5 | 7 | 3 | 2 | 3 | 4 | 4 | 4  | 247 | Hetian  | rela | Pan-sus | 1    | Beijing |
| 4 | 2 | 4 | 3 | 5 | 2 | 3 | 4 | 7 | 3 | 3 | 3 | 4 | 4 | 4  | 279 | Hetian  | new  | Pan-sus | 1    | Beijing |
| 4 | 2 | 4 | 3 | 5 | 2 | 3 | 4 | 5 | 3 | 3 | 3 | 4 | 4 | 4  | 288 | Akesu   | rela | IRS     | 632  | Beijing |
| 4 | 2 | 4 | 3 | 5 | 2 | 3 | 4 | 6 | 3 | 3 | 3 | 4 | 4 | 4  | 194 | Kashgar | new  | ND      | 1    | Beijing |
| 4 | 2 | 4 | 3 | 5 | 3 | 3 | 4 | 6 | 3 | 3 | 3 | 4 | 4 | 4  | 223 | Kashgar | new  | Pan-sus | 1    | Beijing |
| 4 | 2 | 4 | 3 | 5 | 3 | 3 | 4 | 7 | 3 | 3 | 3 | 4 | 4 | 4  | 134 | Akesu   | rela | IS      | 1    | Beijing |
| 4 | 2 | 4 | 3 | 5 | 3 | 3 | 4 | 7 | 3 | 3 | 3 | 4 | 4 | 4  | 304 | Hetian  | new  | Pan-sus | 1    | Beijing |
| 4 | 2 | 4 | 3 | 5 | 3 | 3 | 4 | 7 | 3 | 3 | 2 | 2 | 4 | 4  | 132 | Akesu   | rela | Pan-sus | 1    | Beijing |
| 4 | 2 | 4 | 3 | 5 | 2 | 2 | 4 | 6 | 3 | 3 | 3 | 5 | 4 | 4  | 169 | Akesu   | new  | IES     | 1    | Beijing |
| 4 | 2 | 4 | 3 | 5 | 3 | 2 | 4 | 6 | 3 | 3 | 3 | 5 | 4 | 4  | 225 | Others  | new  | Pan-sus | 1    | Beijing |
| 4 | 2 | 4 | 3 | 5 | 3 | 3 | 4 | 6 | 3 | 3 | 3 | 5 | 4 | 4  | 70  | Akesu   | new  | Pan-sus | 1    | Beijing |
| 4 | 2 | 4 | 3 | 5 | 2 | 3 | 4 | 6 | 3 | 3 | 3 | 5 | 4 | 4  | 289 | Hetian  | new  | Pan-sus | 1    | Beijing |
| 4 | 2 | 4 | 3 | 5 | 2 | 3 | 4 | 7 | 3 | 3 | 3 | 5 | 4 | 4  | 196 | Others  | rela | ND      | 1    | Beijing |
| 4 | 2 | 4 | 3 | 5 | 2 | 3 | 4 | 7 | 3 | 3 | 3 | 5 | 4 | 4  | 219 | Others  | new  | Pan-sus | 1    | Beijing |
| 4 | 2 | 4 | 3 | 5 | 2 | 3 | 5 | 7 | 3 | 3 | 3 | 5 | 4 | 4  | 95  | Kashgar | new  | Pan-sus | 1    | Beijing |
| 4 | 2 | 4 | 3 | 5 | 2 | 3 | 5 | 7 | 3 | 3 | 3 | 5 | 4 | 4  | 212 | Akesu   | new  | Pan-sus | 1    | Beijing |
| 4 | 2 | 4 | 3 | 5 | 3 | 3 | 4 | 7 | 3 | 3 | 3 | 5 | 4 | 4  | 145 | Akesu   | new  | Pan-sus | 1    | Beijing |
| 4 | 2 | 4 | 3 | 5 | 2 | 3 | 5 | 6 | 3 | 3 | 3 | 5 | 3 | 4  | 232 | Others  | rela | Pan-sus | 1    | Beijing |
| 4 | 2 | 4 | 3 | 5 | 2 | 3 | 5 | 6 | 3 | 3 | 2 | 5 | 4 | 4  | 148 | Akesu   | new  | Pan-sus | 1    | Beijing |
| 4 | 2 | 4 | 3 | 5 | 2 | 2 | 5 | 7 | 3 | 3 | 3 | 4 | 4 | 4  | 235 | Hetian  | new  | Pan-sus | 1    | Beijing |
| 4 | 2 | 4 | 3 | 5 | 2 | 2 | 5 | 7 | 3 | 3 | 3 | 4 | 4 | 4  | 328 | Kashgar | new  | Pan-sus | 1    | Beijing |
| 4 | 2 | 4 | 3 | 5 | 2 | 2 | 5 | 7 | 3 | 3 | 3 | 5 | 4 | 4  | 144 | Akesu   | new  | Pan-sus | 1    | Beijing |
| 4 | 2 | 4 | 3 | 5 | 2 | 2 | 5 | 7 | 3 | 3 | 3 | 5 | 4 | 4  | 206 | Others  | new  | Pan-sus | 1    | Beijing |
| 4 | 2 | 4 | 3 | 5 | 2 | 2 | 5 | 6 | 3 | 3 | 3 | 4 | 4 | 4  | 261 | Hetian  | new  | S       | 1    | Beijing |
| 4 | 2 | 4 | 3 | 5 | 2 | 2 | 4 | 7 | 3 | 3 | 3 | 4 | 4 | 4  | 175 | Hetian  | rela | I       | 1    | Beijing |
| 4 | 2 | 4 | 3 | 5 | 3 | 2 | 4 | 7 | 3 | 3 | 3 | 4 | 4 | 4  | 325 | Kashgar | rela | Pan-sus | 1    | Beijing |
| 4 | 2 | 4 | 3 | 5 | 3 | 2 | 4 | 7 | 3 | 3 | 3 | 5 | 4 | 4  | 114 | Kashgar | new  | Pan-sus | 1    | Beijing |
| 4 | 2 | 4 | 3 | 5 | 3 | 3 | 5 | 7 | 3 | 3 | 3 | 5 | 4 | 4  | 277 | Others  | new  | Pan-sus | 1    | Beijing |
| 4 | 2 | 4 | 3 | 5 | 3 | 3 | 2 | 5 | 7 | 3 | 3 | 4 | 4 | 4  | 178 | Kashgar | new  | Pan-sus | 1    | Beijing |
| 4 | 2 | 4 | 3 | 5 | 3 | 2 | 5 | 7 | 3 | 3 | 3 | 4 | 4 | 4  | 262 | Hetian  | rela | I       | 1    | Beijing |
| 4 | 2 | 4 | 3 | 5 | 3 | 2 | 5 | 7 | 3 | 3 | 3 | 4 | 4 | 4  | 314 | Kashgar | new  | Pan-sus | 1    | Beijing |
| 4 | 2 | 4 | 3 | 5 | 3 | 3 | 5 | 7 | 3 | 3 | 3 | 4 | 4 | 4  | 165 | Hetian  | new  | Pan-sus | 1    | Beijing |
| 4 | 2 | 4 | 3 | 5 | 3 | 3 | 5 | 7 | 3 | 3 | 3 | 4 | 4 | 4  | 203 | Others  | rela | Pan-sus | 1    | Beijing |
| 4 | 2 | 4 | 3 | 5 | 3 | 2 | 4 | 7 | 3 | 3 | 3 | 4 | 4 | 4  | 87  | Kashgar | rela | Pan-sus | 1    | Beijing |
| 4 | 2 | 4 | 3 | 5 | 3 | 2 | 4 | 7 | 3 | 3 | 3 | 4 | 4 | 4  | 128 | Akesu   | new  | I       | 1    | Beijing |
| 4 | 2 | 4 | 3 | 5 | 3 | 2 | 5 | 7 | 3 | 3 | 3 | 4 | 4 | 4  | 6   | Kashgar | rela | ND      | 1    | Beijing |
| 4 | 2 | 4 | 3 | 5 | 3 | 2 | 4 | 6 | 3 | 3 | 3 | 4 | 4 | 4  | 126 | Akesu   | new  | Pan-sus | 1    | Beijing |
| 4 | 2 | 4 | 3 | 5 | 3 | 2 | 4 | 6 | 3 | 3 | 3 | 4 | 4 | 4  | 118 | Kashgar | rela | I       | 1    | Beijing |
| 4 | 2 | 4 | 3 | 5 | 2 | 2 | 5 | 6 | 3 | 3 | 3 | 4 | 4 | 4  | 119 | Kashgar | new  | Pan-sus | 1    | Beijing |
| 4 | 2 | 4 | 3 | 5 | 2 | 3 | 5 | 7 | 3 | 3 | 2 | 4 | 4 | 4  | 242 | Akesu   | rela | Pan-sus | 1    | Beijing |
| 4 | 2 | 4 | 3 | 5 | 2 | 3 | 5 | 7 | 3 | 3 | 3 | 4 | 4 | 4  | 280 | Others  | new  | Pan-sus | 1    | Beijing |
| 4 | 2 | 4 | 3 | 5 | 2 | 3 | 5 | 7 | 3 | 3 | 3 | 4 | 4 | 0  | 252 | Akesu   | new  | Pan-sus | 1    | Beijing |
| 4 | 2 | 4 | 3 | 5 | 2 | 3 | 5 | 6 | 3 | 3 | 3 | 4 | 4 | 7  | 219 | Akesu   | new  | Pan-sus | 1    | Beijing |
| 4 | 2 | 4 | 3 | 5 | 2 | 3 | 5 | 6 | 3 | 3 | 3 | 4 | 4 | 13 | 234 | Akesu   | new  | I       | 1    | Beijing |
| 4 | 2 | 4 | 3 | 5 | 2 | 3 | 5 | 8 | 2 | 3 | 3 | 4 | 4 | 4  | 107 | Kashgar | new  | Pan-sus | 1311 | Beijing |
| 4 | 2 | 4 | 3 | 5 | 2 | 2 | 5 | 5 | 3 | 3 | 3 | 4 | 3 | 4  | 147 | Akesu   | rela | Pan-sus | 632  | Beijing |
| 4 | 2 | 4 | 3 | 5 | 2 | 4 | 5 | 5 | 3 | 3 | 3 | 4 | 4 | 4  | 298 | Akesu   | rela | ND      | 632  | Beijing |
| 4 | 2 | 4 | 1 | 5 | 2 | 2 | 5 | 5 | 3 | 3 | 3 | 4 | 4 | 5  | 237 | Hetian  | new  | I       | 260  | Beijing |
| 4 | 2 | 4 | 3 | 4 | 3 | 3 | 5 | 7 | 3 | 3 | 3 | 5 | 4 | 5  | 9   | Kashgar | new  | ND      | 265  | Beijing |
| 4 | 2 | 4 | 3 | 7 | 3 | 3 | 5 | 7 | 3 | 3 | 3 | 0 | 4 | 4  | 305 | Kashgar | rela | IS      | 1162 | Beijing |
| 4 | 2 | 4 | 3 | 5 | 3 | 3 | 4 | 7 | 3 | 3 | 3 | 5 | 4 | 4  | 35  | Akesu   | rela | Pan-sus | 1    | Beijing |
| 4 | 2 | 4 | 3 | 5 | 3 | 3 | 4 | 7 | 3 | 3 | 3 | 5 | 4 | 4  | 90  | Kashgar | new  | Pan-sus | 1    | Beijing |
| 4 | 2 | 4 | 3 | 5 | 3 | 3 | 4 | 7 | 3 | 3 | 3 | 5 | 4 | 4  | 129 | Akesu   | new  | Pan-sus | 1    | Beijing |
| 4 | 2 | 4 | 3 | 5 | 3 | 3 | 5 | 7 | 3 | 3 | 3 | 5 | 4 | 4  | 13  | Kashgar | rela | ND      | 1    | Beijing |
| 4 | 2 | 4 | 3 | 5 | 3 | 3 | 5 | 7 | 3 | 3 | 3 | 5 | 4 | 4  | 19  | Kashgar | new  | IRS     | 1    | Beijing |
| 4 | 2 | 4 | 3 | 5 | 3 | 3 | 5 | 7 | 3 | 3 | 3 | 5 | 4 | 4  | 174 | Akesu   | new  | IRE     | 1    | Beijing |
| 4 | 2 | 4 | 3 | 5 | 3 | 3 | 5 | 7 | 3 | 3 | 3 | 5 | 4 | 4  | 207 | Akesu   | new  | IRSE    | 1    | Beijing |
| 4 | 2 | 4 | 3 | 5 | 3 | 3 | 5 | 7 | 3 | 3 | 3 | 5 | 4 | 4  | 264 | Hetian  | rela | R       | 1    | Beijing |
| 4 | 2 | 4 | 3 | 5 | 3 | 3 | 5 | 7 | 3 | 3 | 3 | 5 | 4 | 4  | 286 | Others  | new  | IRSE    | 1    | Beijing |
| 4 | 2 | 4 | 3 | 5 | 2 | 3 | 5 | 7 | 3 | 3 | 3 | 5 | 4 | 4  | 345 | Akesu   | rela | ND      | 1    | Beijing |
| 4 | 2 | 4 | 3 | 5 | 3 | 3 | 5 | 7 | 3 | 3 | 3 | 5 | 3 | 4  | 31  | Akesu   | new  | I       | 1    | Beijing |
| 4 | 2 | 4 | 3 | 5 | 3 | 3 | 5 | 7 | 2 | 3 | 3 | 5 | 4 | 4  | 30  | Akesu   | new  | Pan-sus | 1    | Beijing |
| 4 | 2 | 4 | 3 | 5 | 3 | 3 | 5 | 7 | 2 | 2 | 3 | 5 | 4 | 4  | 306 | Hetian  | rela | IR      | 1    | Beijing |
| 4 | 2 | 4 | 3 | 5 | 3 | 3 | 5 | 6 | 2 | 3 | 3 | 5 | 4 | 4  | 81  | Kashgar | new  | Pan-sus | 1    | Beijing |
| 4 | 2 | 4 | 3 | 5 | 3 | 3 | 5 | 6 | 2 | 3 | 3 | 5 | 4 | 4  | 208 | Others  | rela | IRSE    | 1    | Beijing |
| 4 | 2 | 4 | 3 | 5 | 3 | 3 | 5 | 6 | 2 | 3 | 3 | 5 | 4 | 4  | 296 | Others  | rela | IRSE    | 1    | Beijing |
| 4 | 2 | 4 | 3 | 5 | 3 | 3 | 5 | 6 | 2 | 3 | 3 | 5 | 4 | 4  | 297 | Akesu   | new  | IRSE    | 1    | Beijing |
| 4 | 2 | 4 | 3 | 5 | 3 | 3 | 5 | 6 | 2 | 3 | 3 | 5 | 4 | 4  | 300 | Others  | rela | ND      | 1    | Beijing |
| 4 | 2 | 4 | 3 | 5 | 3 | 3 | 5 | 6 | 2 | 3 | 3 | 5 |   |    |     |         |      |         |      |         |

|   |   |   |   |   |   |   |   |   |   |   |   |   |            |            |         |         |         |         |         |         |
|---|---|---|---|---|---|---|---|---|---|---|---|---|------------|------------|---------|---------|---------|---------|---------|---------|
| 4 | 2 | 4 | 3 | 3 | 3 | 5 | 6 | 3 | 3 | 5 | 4 | 4 | Cluster 15 | 33         | Akesu   | new     | Pan-sus | 1       | Beijing |         |
| 4 | 2 | 4 | 3 | 5 | 3 | 5 | 6 | 3 | 3 | 3 | 5 | 4 | Cluster 15 | 59         | Akesu   | rela    | Pan-sus | 1       | Beijing |         |
| 4 | 2 | 4 | 3 | 5 | 3 | 3 | 5 | 6 | 3 | 3 | 5 | 4 | Cluster 15 | 77         | Akesu   | rela    | IR      | 1       | Beijing |         |
| 4 | 2 | 4 | 3 | 5 | 3 | 3 | 5 | 6 | 3 | 3 | 5 | 4 | Cluster 15 | 82         | Kashgar | rela    | Pan-sus | 1       | Beijing |         |
| 4 | 2 | 4 | 3 | 5 | 3 | 3 | 5 | 6 | 3 | 3 | 5 | 4 | Cluster 15 | 86         | Kashgar | new     | Pan-sus | 1       | Beijing |         |
| 4 | 2 | 4 | 3 | 5 | 3 | 3 | 5 | 6 | 3 | 3 | 5 | 4 | Cluster 15 | 220        | Others  | new     | IRSE    | 1       | Beijing |         |
| 4 | 2 | 4 | 3 | 5 | 3 | 3 | 5 | 6 | 3 | 3 | 5 | 4 | Cluster 15 | 241        | Kashgar | rela    | IR      | 1       | Beijing |         |
| 4 | 2 | 4 | 3 | 5 | 3 | 3 | 5 | 6 | 3 | 3 | 5 | 4 |            | 293        | Hetian  | rela    | IRS     | 1       | Beijing |         |
| 4 | 2 | 4 | 3 | 5 | 2 | 3 | 5 | 6 | 3 | 3 | 5 | 4 |            | 29         | Akesu   | new     | I       | 1       | Beijing |         |
| 4 | 2 | 4 | 3 | 5 | 2 | 3 | 5 | 6 | 3 | 3 | 5 | 4 |            | 50         | Akesu   | rela    | S       | 1       | Beijing |         |
| 4 | 2 | 4 | 3 | 5 | 2 | 3 | 5 | 7 | 3 | 2 | 3 | 5 | 4          | Cluster 16 | 54      | Kashgar | rela    | Pan-sus | 1       | Beijing |
| 4 | 2 | 4 | 3 | 5 | 3 | 3 | 5 | 7 | 3 | 2 | 3 | 5 | 4          | Cluster 16 | 60      | Akesu   | rela    | IRSE    | 1       | Beijing |
| 4 | 2 | 4 | 3 | 5 | 3 | 3 | 5 | 7 | 3 | 2 | 3 | 5 | 4          | Cluster 16 | 88      | Kashgar | rela    | Pan-sus | 1       | Beijing |
| 4 | 2 | 4 | 3 | 5 | 3 | 3 | 5 | 6 | 3 | 2 | 3 | 5 | 4          | Cluster 17 | 39      | Akesu   | rela    | I       | 1       | Beijing |
| 4 | 2 | 4 | 3 | 5 | 3 | 3 | 5 | 6 | 3 | 2 | 3 | 5 | 4          | Cluster 17 | 76      | Akesu   | rela    | IR      | 1       | Beijing |
| 4 | 2 | 4 | 3 | 5 | 3 | 3 | 5 | 6 | 3 | 2 | 3 | 5 | 4          | Cluster 17 | 160     | Hetian  | new     | ND      | 1       | Beijing |
| 4 | 2 | 4 | 3 | 5 | 3 | 3 | 5 | 6 | 3 | 2 | 3 | 5 | 4          | Cluster 17 | 299     | Hetian  | rela    | IR      | 1       | Beijing |
| 4 | 2 | 4 | 3 | 5 | 3 | 3 | 5 | 6 | 3 | 2 | 3 | 5 | 4          | Cluster 17 | 309     | Hetian  | rela    | ND      | 1       | Beijing |
| 4 | 2 | 4 | 3 | 5 | 3 | 3 | 5 | 6 | 3 | 2 | 3 | 5 | 4          | Cluster 17 | 344     | Akesu   | rela    | ND      | 1       | Beijing |
| 4 | 2 | 4 | 3 | 5 | 3 | 3 | 5 | 7 | 3 | 2 | 3 | 4 | 4          | Cluster 18 | 7       | Kashgar | rela    | ND      | 1       | Beijing |
| 4 | 2 | 4 | 3 | 5 | 3 | 3 | 5 | 7 | 3 | 2 | 3 | 4 | 4          | Cluster 18 | 23      | Akesu   | rela    | Pan-sus | 1       | Beijing |
| 4 | 2 | 4 | 3 | 5 | 3 | 3 | 5 | 7 | 3 | 2 | 3 | 4 | 4          | Cluster 18 | 61      | Akesu   | rela    | Pan-sus | 1       | Beijing |
| 4 | 2 | 4 | 3 | 5 | 3 | 3 | 5 | 7 | 3 | 2 | 3 | 4 | 4          | Cluster 18 | 138     | Akesu   | rela    | Pan-sus | 1       | Beijing |
| 4 | 2 | 4 | 3 | 5 | 3 | 3 | 5 | 7 | 3 | 2 | 3 | 4 | 4          | Cluster 19 | 5       | Kashgar | new     | ND      | 1       | Beijing |
| 4 | 2 | 4 | 3 | 5 | 3 | 3 | 5 | 7 | 3 | 3 | 3 | 4 | 4          | Cluster 19 | 15      | Kashgar | rela    | ND      | 1       | Beijing |
| 4 | 2 | 4 | 3 | 5 | 3 | 3 | 5 | 7 | 3 | 3 | 3 | 4 | 4          | Cluster 19 | 125     | Akesu   | new     | I       | 1       | Beijing |
| 4 | 2 | 4 | 3 | 5 | 3 | 3 | 5 | 7 | 3 | 3 | 3 | 4 | 4          | Cluster 19 | 161     | Kashgar | new     | IS      | 1       | Beijing |
| 4 | 2 | 4 | 3 | 5 | 3 | 3 | 5 | 7 | 3 | 3 | 3 | 4 | 4          | Cluster 19 | 197     | Kashgar | new     | IRS     | 1       | Beijing |
| 4 | 2 | 4 | 3 | 5 | 3 | 3 | 5 | 7 | 3 | 3 | 3 | 4 | 4          | Cluster 19 | 310     | Others  | new     | ND      | 1       | Beijing |
| 4 | 2 | 4 | 3 | 5 | 3 | 3 | 5 | 7 | 3 | 4 | 3 | 4 | 4          |            | 3       | Kashgar | rela    | IR      | 1311    | Beijing |
| 4 | 2 | 4 | 3 | 5 | 3 | 3 | 5 | 7 | 3 | 2 | 3 | 4 | 4          |            | 177     | Kashgar | new     | IR      | 1       | Beijing |
| 4 | 2 | 4 | 3 | 5 | 3 | 3 | 5 | 6 | 3 | 3 | 3 | 4 | 4          | Cluster 20 | 36      | Akesu   | new     | Pan-sus | 1       | Beijing |
| 4 | 2 | 4 | 3 | 5 | 3 | 3 | 5 | 6 | 3 | 3 | 3 | 4 | 4          | Cluster 20 | 123     | Akesu   | new     | Pan-sus | 1       | Beijing |
| 4 | 2 | 4 | 3 | 5 | 3 | 3 | 5 | 6 | 3 | 3 | 3 | 4 | 4          | Cluster 20 | 124     | Akesu   | new     | I       | 1       | Beijing |
| 4 | 2 | 4 | 3 | 5 | 3 | 3 | 5 | 6 | 3 | 3 | 3 | 4 | 4          | Cluster 21 | 1       | Kashgar | rela    | IRE     | 1       | Beijing |
| 4 | 2 | 4 | 3 | 5 | 3 | 3 | 5 | 6 | 3 | 3 | 3 | 4 | 4          | Cluster 21 | 26      | Akesu   | rela    | Pan-sus | 1       | Beijing |
| 4 | 2 | 4 | 3 | 5 | 3 | 3 | 5 | 6 | 3 | 3 | 3 | 4 | 4          | Cluster 21 | 63      | Akesu   | rela    | Pan-sus | 1       | Beijing |
| 4 | 2 | 4 | 3 | 5 | 3 | 3 | 5 | 6 | 3 | 3 | 3 | 4 | 4          | Cluster 21 | 120     | Akesu   | rela    | E       | 1       | Beijing |
| 4 | 2 | 4 | 3 | 5 | 3 | 3 | 5 | 6 | 3 | 3 | 3 | 4 | 4          | Cluster 21 | 179     | Hetian  | rela    | RS      | 1       | Beijing |
| 4 | 2 | 4 | 3 | 5 | 3 | 3 | 5 | 6 | 3 | 3 | 3 | 4 | 4          | Cluster 21 | 313     | Hetian  | rela    | IR      | 1       | Beijing |
| 4 | 2 | 4 | 3 | 5 | 3 | 3 | 5 | 7 | 3 | 3 | 3 | 4 | 4          |            | 209     | Akesu   | new     | Pan-sus | 1       | Beijing |
| 4 | 2 | 4 | 3 | 5 | 3 | 3 | 5 | 7 | 3 | 3 | 3 | 4 | 4          |            | 236     | Hetian  | rela    | IRS     | 1       | Beijing |
| 4 | 2 | 4 | 3 | 5 | 3 | 3 | 4 | 6 | 3 | 3 | 3 | 4 | 4          | Cluster 22 | 91      | Kashgar | new     | Pan-sus | 1       | Beijing |
| 4 | 2 | 4 | 3 | 5 | 3 | 3 | 4 | 6 | 3 | 3 | 3 | 4 | 4          | Cluster 22 | 319     | Kashgar | rela    | IRE     | 1       | Beijing |
| 4 | 2 | 4 | 3 | 5 | 3 | 3 | 4 | 6 | 3 | 3 | 3 | 5 | 4          | Cluster 23 | 58      | Akesu   | new     | Pan-sus | 1       | Beijing |
| 4 | 2 | 4 | 3 | 5 | 3 | 3 | 4 | 6 | 3 | 3 | 3 | 5 | 4          | Cluster 23 | 183     | Others  | rela    | RS      | 1       | Beijing |
| 4 | 2 | 4 | 3 | 5 | 3 | 3 | 4 | 6 | 3 | 3 | 3 | 5 | 4          | Cluster 23 | 333     | Hetian  | new     | Pan-sus | 1       | Beijing |
| 4 | 2 | 4 | 3 | 5 | 3 | 3 | 4 | 6 | 3 | 3 | 2 | 5 | 4          |            | 93      | Kashgar | rela    | Pan-sus | 1       | Beijing |
| 4 | 2 | 4 | 3 | 5 | 3 | 3 | 4 | 6 | 3 | 3 | 3 | 5 | 3          |            | 45      | Akesu   | rela    | Pan-sus | 1       | Beijing |
| 4 | 2 | 4 | 3 | 5 | 3 | 3 | 4 | 6 | 3 | 3 | 3 | 4 | 4          |            | 130     | Akesu   | new     | Pan-sus | 1       | Beijing |
| 4 | 2 | 4 | 3 | 5 | 3 | 3 | 4 | 6 | 2 | 3 | 3 | 4 | 4          |            | 185     | Hetian  | rela    | IRS     | 1       | Beijing |
| 4 | 2 | 4 | 3 | 5 | 2 | 3 | 5 | 6 | 2 | 3 | 3 | 4 | 4          |            | 71      | Akesu   | rela    | IR      | 1       | Beijing |
| 4 | 2 | 4 | 3 | 5 | 2 | 3 | 5 | 6 | 2 | 3 | 3 | 4 | 4          |            | 334     | Hetian  | rela    | RS      | 1       | Beijing |
| 4 | 2 | 4 | 3 | 5 | 3 | 3 | 5 | 6 | 2 | 2 | 3 | 4 | 4          | Cluster 24 | 94      | Kashgar | rela    | Pan-sus | 1       | Beijing |
| 4 | 2 | 4 | 3 | 5 | 3 | 3 | 5 | 6 | 2 | 2 | 3 | 4 | 4          | Cluster 24 | 167     | Hetian  | rela    | IRS     | 1       | Beijing |
| 4 | 2 | 4 | 3 | 5 | 3 | 3 | 5 | 6 | 2 | 2 | 3 | 4 | 4          | Cluster 24 | 301     | Kashgar | rela    | ND      | 1       | Beijing |
| 4 | 2 | 4 | 3 | 5 | 3 | 3 | 5 | 6 | 2 | 2 | 3 | 5 | 4          |            | 78      | Akesu   | new     | Pan-sus | 1       | Beijing |
| 4 | 2 | 4 | 3 | 5 | 2 | 3 | 5 | 7 | 2 | 2 | 3 | 4 | 4          | Cluster 25 | 65      | Akesu   | new     | Pan-sus | 1       | Beijing |
| 4 | 2 | 4 | 3 | 5 | 2 | 3 | 5 | 7 | 2 | 2 | 3 | 4 | 4          | Cluster 25 | 154     | Akesu   | rela    | IR      | 1       | Beijing |
| 4 | 2 | 4 | 3 | 5 | 2 | 3 | 5 | 7 | 2 | 2 | 3 | 5 | 4          |            | 89      | Kashgar | new     | Pan-sus | 1       | Beijing |
| 4 | 2 | 4 | 3 | 5 | 2 | 3 | 5 | 6 | 3 | 2 | 3 | 4 | 3          |            | 146     | Akesu   | rela    | IRSE    | 1       | Beijing |
| 4 | 2 | 4 | 3 | 5 | 2 | 3 | 5 | 6 | 3 | 2 | 3 | 4 | 4          |            | 336     | Others  | rela    | ND      | 1       | Beijing |
| 4 | 2 | 4 | 3 | 5 | 2 | 3 | 5 | 6 | 3 | 2 | 3 | 4 | 4          | Cluster 26 | 294     | Akesu   | rela    | IRS     | 1       | Beijing |
| 4 | 2 | 4 | 3 | 5 | 2 | 3 | 5 | 6 | 3 | 2 | 3 | 4 | 4          | Cluster 26 | 312     | Kashgar | rela    | ND      | 1       | Beijing |
| 4 | 2 | 4 | 3 | 5 | 2 | 3 | 5 | 6 | 3 | 2 | 3 | 4 | 4          |            | 290     | Kashgar | rela    | IR      | 1       | Beijing |
| 4 | 2 | 4 | 3 | 5 | 2 | 3 | 4 | 6 | 2 | 2 | 3 | 5 | 4          |            | 73      | Akesu   | rela    | ND      | 1       | Beijing |
| 4 | 2 | 4 | 3 | 5 | 3 | 3 | 4 | 6 | 2 | 2 | 3 | 5 | 4          |            | 172     | Hetian  | rela    | IRE     | 1       | Beijing |
| 4 | 2 | 4 | 3 | 5 | 2 | 3 | 4 | 6 | 3 | 2 | 3 | 5 | 4          | Cluster 27 | 303     | Akesu   | new     | R       | 1       | Beijing |
| 4 | 2 | 4 | 3 | 5 | 2 | 3 | 4 | 6 | 3 | 2 | 3 | 5 | 4          | Cluster 27 | 343     | Others  | rela    | ND      | 1       | Beijing |
| 4 | 2 | 4 | 3 | 5 | 3 | 3 | 4 | 6 | 3 | 2 | 3 | 5 | 4          | Cluster 28 | 52      | Akesu   | rela    | Pan-sus | 1       | Beijing |
| 4 | 2 | 4 | 3 | 5 | 3 | 3 | 4 | 6 | 3 | 2 | 3 | 5 | 4          | Cluster 28 | 57      | Akesu   | new     | Pan-sus | 1       | Beijing |
| 4 | 2 | 4 | 3 | 5 | 3 | 3 | 4 | 6 | 3 | 2 | 3 | 5 | 4          | Cluster 28 | 159     | Hetian  | rela    | IRSE    | 1       | Beijing |
| 4 | 2 | 4 | 3 | 5 | 2 | 3 | 4 | 6 | 3 | 2 | 2 | 5 | 4          |            | 49      | Akesu   | new     | IR      | 1       | Beijing |
| 4 | 2 | 4 | 3 | 5 | 2 | 3 | 4 | 7 | 3 | 2 | 3 | 5 | 4          |            | 53      | Akesu   | rela    | I       | 1       | Beijing |
| 3 | 2 | 4 | 3 | 5 | 2 | 3 | 4 | 6 | 3 | 2 | 3 | 5 | 2          |            | 68      | Akesu   | new     | IRS     | 190     | Beijing |
| 4 | 2 | 4 | 3 | 5 | 2 | 2 | 5 | 6 | 2 | 2 | 3 | 4 | 3          | Cluster 29 | 150     | Akesu   | rela    | IS      | 1       | Beijing |
| 4 | 2 | 4 | 3 | 5 | 2 | 2 | 5 | 6 | 2 | 2 | 3 | 4 | 3          | Cluster 29 | 258     | Kashgar | new     | Pan-sus | 1       | Beijing |
| 4 | 2 | 4 | 3 | 5 | 2 | 3 | 5 | 6 | 2 | 2 | 3 | 4 | 3          |            | 340     | Hetian  | new     | ND      | 1       | Beijing |
| 4 | 2 | 4 | 3 | 5 | 2 | 2 | 5 | 7 | 2 | 2 | 3 | 5 | 3          |            | 257     | Hetian  | new     | I       | 1       | Beijing |
| 4 | 2 | 4 | 3 | 5 | 2 | 3 | 5 | 6 | 2 | 2 | 3 | 5 | 4          |            | 155     | Akesu   | new     | Pan-sus | 1       | Beijing |
| 4 | 2 | 4 | 3 | 5 | 2 | 2 | 4 | 6 | 2 | 2 | 3 | 5 | 4          |            | 190     | Akesu   | new     | ND      | 1       | Beijing |
| 4 | 2 | 4 | 3 | 5 | 2 | 2 | 4 | 6 | 2 | 2 | 3 | 4 | 4          |            | 192     | Akesu   | new     | Pan-sus | 1       | Beijing |
| 4 | 2 | 4 | 3 | 5 | 2 | 2 | 4 | 6 | 2 | 3 | 3 | 4 | 4          |            | 201     | Kashgar | rela    | Pan-sus | 1       | Beijing |
| 4 | 2 | 4 | 3 | 5 | 2 | 2 | 5 | 6 | 2 | 3 | 3 | 5 | 4          |            | 102     | Kashgar | rela    | RSE     | 1       | Beijing |
| 4 | 2 | 4 | 3 | 5 | 2 | 2 | 4 | 6 | 2 | 3 | 3 | 5 | 4          |            | 170     | Akesu   | rela    | S       | 1       | Beijing |
| 4 | 2 | 4 | 3 | 5 | 2 | 2 | 5 | 7 | 3 | 2 | 2 | 5 | 3          |            | 149     | Akesu   | new     | Pan-sus | 1       | Beijing |
| 4 | 2 | 4 | 3 | 5 | 2 | 2 | 5 | 6 | 3 | 2 | 2 | 5 | 3          |            | 202     | Hetian  | rela    | Pan-sus | 1       | Beijing |
| 4 | 2 | 4 | 3 | 5 | 2 | 2 | 5 | 6 | 3 | 2 | 2 | 5 | 4          |            | 323     | Akesu   | new     | Pan-sus | 1       | Beijing |
| 4 | 2 | 4 | 3 | 5 | 2 | 2 | 5 | 6 | 3 | 2 | 2 | 5 | 3          |            | 271     | Hetian  | rela    | Pan-sus | 1       | Beijing |
| 4 | 2 | 4 | 3 | 5 | 2 | 2 | 5 | 6 | 3 | 3 | 2 | 5 | 3          |            | 152     | Akesu   | new     | Pan-sus | 1       | Beijing |
| 4 | 2 | 4 | 3 | 5 | 2 | 2 | 5 | 6 | 3 | 3 | 2 | 4 | 3          |            |         |         |         |         |         |         |

|   |   |   |   |   |   |   |   |   |   |   |   |   |   |   |     |         |       |         |               |             |         |
|---|---|---|---|---|---|---|---|---|---|---|---|---|---|---|-----|---------|-------|---------|---------------|-------------|---------|
| 4 | 2 | 4 | 3 | 5 | 2 | 2 | 5 | 6 | 3 | 2 | 2 | 4 | 3 | 4 | 270 | Akesu   | new   | Pan-sus | 1             | Beijing     |         |
| 4 | 2 | 4 | 3 | 5 | 2 | 2 | 5 | 6 | 3 | 2 | 2 | 3 | 5 | 3 | 4   | 136     | Akesu | new     | I             | 1           | Beijing |
| 4 | 2 | 4 | 3 | 5 | 3 | 2 | 5 | 6 | 3 | 2 | 3 | 5 | 3 | 4 | 186 | Others  | new   | IRSE    | 1             | Beijing     |         |
| 4 | 2 | 4 | 3 | 5 | 3 | 2 | 5 | 6 | 3 | 2 | 3 | 5 | 4 | 4 | 162 | Others  | new   | Pan-sus | 1             | Beijing     |         |
| 4 | 2 | 4 | 3 | 5 | 3 | 2 | 5 | 6 | 3 | 3 | 3 | 5 | 3 | 4 | 274 | Akesu   | rela  | Pan-sus | 1             | Beijing     |         |
| 3 | 2 | 4 | 3 | 5 | 2 | 2 | 5 | 3 | 3 | 2 | 2 | 4 | 4 | 4 | 135 | Akesu   | new   | Pan-sus | 632           | Beijing     |         |
| 4 | 2 | 4 | 3 | 5 | 2 | 3 | 4 | 6 | 2 | 3 | 2 | 4 | 3 | 4 | 108 | Kashgar | rela  | Pan-sus | 1             | Beijing     |         |
| 4 | 2 | 4 | 3 | 5 | 2 | 3 | 4 | 6 | 2 | 3 | 2 | 4 | 4 | 4 | 239 | Akesu   | new   | IRS     | 1             | Beijing     |         |
| 4 | 2 | 4 | 3 | 5 | 3 | 3 | 4 | 6 | 2 | 2 | 2 | 5 | 3 | 4 | 240 | Hetian  | new   | IRS     | 1             | Beijing     |         |
| 4 | 2 | 4 | 3 | 5 | 3 | 3 | 5 | 6 | 3 | 3 | 2 | 4 | 4 | 4 | 122 | Akesu   | rela  | Pan-sus | 1             | Beijing     |         |
| 4 | 2 | 4 | 3 | 5 | 3 | 3 | 5 | 6 | 3 | 3 | 2 | 4 | 4 | 4 | 273 | Hetian  | new   | S       | 1             | Beijing     |         |
| 4 | 2 | 4 | 3 | 5 | 3 | 3 | 4 | 6 | 3 | 3 | 2 | 4 | 4 | 4 | 244 | Akesu   | rela  | Pan-sus | 1             | Beijing     |         |
| 4 | 2 | 4 | 3 | 5 | 3 | 3 | 5 | 6 | 3 | 2 | 2 | 4 | 3 | 4 | 337 | Akesu   | new   | ND      | 1             | Beijing     |         |
| 4 | 2 | 4 | 3 | 5 | 3 | 2 | 4 | 6 | 3 | 3 | 2 | 4 | 3 | 4 | 117 | Kashgar | rela  | Pan-sus | 1             | Beijing     |         |
| 4 | 2 | 4 | 3 | 5 | 3 | 2 | 4 | 7 | 2 | 2 | 3 | 4 | 4 | 4 | 113 | Kashgar | rela  | S       | 1             | Beijing     |         |
| 4 | 2 | 4 | 3 | 5 | 3 | 2 | 4 | 7 | 2 | 3 | 2 | 4 | 4 | 4 | 243 | Akesu   | rela  | Pan-sus | 1             | Beijing     |         |
| 4 | 2 | 4 | 3 | 5 | 3 | 3 | 5 | 7 | 2 | 3 | 2 | 4 | 3 | 4 | 112 | Kashgar | new   | Pan-sus | 1             | Beijing     |         |
| 4 | 2 | 4 | 3 | 5 | 3 | 2 | 5 | 7 | 2 | 3 | 2 | 4 | 3 | 4 | 339 | Akesu   | rela  | ND      | 1             | Beijing     |         |
| 4 | 2 | 4 | 3 | 2 | 5 | 5 | 5 | 6 | 2 | 3 | 3 | 4 | 4 | 4 | 85  | Kashgar | new   | Pan-sus | Orphan or New | Unknown     |         |
| 4 | 2 | 4 | 0 | 6 | 3 | 3 | 6 | 8 | 3 | 3 | 3 | 5 | 4 | 4 | 166 | Hetian  | rela  | IS      | 190           | Beijing     |         |
| 4 | 2 | 4 | 3 | 6 | 3 | 3 | 5 | 8 | 3 | 3 | 3 | 5 | 4 | 4 | 182 | Kashgar | rela  | IS      | 1162          | Beijing     |         |
| 4 | 2 | 2 | 0 | 6 | 3 | 3 | 6 | 8 | 3 | 4 | 3 | 4 | 4 | 4 | 330 | Hetian  | new   | IS      | Orphan or New | Not defined |         |
| 3 | 2 | 4 | 3 | 5 | 3 | 3 | 5 | 7 | 3 | 2 | 3 | 4 | 2 | 4 | 153 | Akesu   | rela  | IRSE    | 190           | Beijing     |         |
| 3 | 2 | 4 | 3 | 2 | 3 | 3 | 5 | 6 | 3 | 2 | 3 | 5 | 2 | 4 | 307 | Akesu   | rela  | ND      | 190           | Beijing     |         |
| 2 | 2 | 4 | 3 | 2 | 3 | 3 | 6 | 3 | 3 | 2 | 3 | 2 | 2 | 4 | 32  | Akesu   | new   | Pan-sus | Orphan or New | T2          |         |
| 4 | 2 | 4 | 3 | 3 | 3 | 3 | 4 | 6 | 3 | 2 | 3 | 2 | 4 | 3 | 171 | Kashgar | rela  | IRS     | 218           | H1          |         |
| 4 | 2 | 2 | 3 | 7 | 4 | 5 | 5 | 7 | 3 | 2 | 3 | 4 | 4 | 4 | 47  | Akesu   | rela  | IR      | Orphan or New | Unknown     |         |
| 4 | 2 | 4 | 3 | 7 | 3 | 1 | 5 | 7 | 3 | 2 | 3 | 5 | 4 | 4 | 84  | Kashgar | rela  | I       | 190           | Beijing     |         |
| 4 | 2 | 0 | 0 | 7 | 5 | 5 | 6 | 7 | 3 | 3 | 3 | 4 | 4 | 4 | 21  | Akesu   | rela  | Pan-sus | Orphan or New | Unknown     |         |
| 4 | 3 | 4 | 3 | 7 | 5 | 4 | 5 | 6 | 3 | 2 | 2 | 5 | 4 | 4 | 121 | Akesu   | new   | Pan-sus | 27            | EAI         |         |
| 4 | 3 | 4 | 3 | 7 | 6 | 4 | 4 | 6 | 3 | 3 | 2 | 4 | 4 | 4 | 131 | Akesu   | new   | Pan-sus | 27            | EAI         |         |
| 3 | 1 | 4 | 3 | 2 | 1 | 2 | 6 | 3 | 3 | 2 | 4 | 2 | 2 | 4 | 156 | Akesu   | new   | Pan-sus | 53            | T1          |         |
| 3 | 1 | 4 | 3 | 2 | 1 | 2 | 6 | 5 | 3 | 2 | 3 | 3 | 2 | 4 | 229 | Hetian  | new   | Pan-sus | 2087          | H3          |         |
| 3 | 1 | 4 | 3 | 2 | 1 | 1 | 5 | 3 | 3 | 2 | 2 | 2 | 2 | 4 | 269 | Others  | rela  | Pan-sus | Orphan or New | Not defined |         |
| 3 | 1 | 4 | 3 | 5 | 1 | 2 | 4 | 6 | 3 | 2 | 2 | 3 | 2 | 4 | 268 | Hetian  | new   | Pan-sus | 53            | T1          |         |
| 3 | 1 | 3 | 3 | 2 | 2 | 2 | 5 | 5 | 3 | 2 | 3 | 3 | 2 | 4 | 44  | Akesu   | new   | I       | 127           | Ural-2      |         |
| 3 | 1 | 4 | 0 | 2 | 2 | 2 | 5 | 5 | 3 | 2 | 3 | 3 | 2 | 4 | 260 | Akesu   | new   | I       | 127           | Ural-2      |         |
| 2 | 1 | 4 | 3 | 2 | 2 | 2 | 5 | 4 | 3 | 2 | 3 | 3 | 2 | 4 | 42  | Akesu   | rela  | Pan-sus | 127           | Ural-2      |         |
| 3 | 1 | 4 | 3 | 2 | 1 | 2 | 5 | 4 | 3 | 2 | 3 | 3 | 2 | 4 | 137 | Akesu   | rela  | Pan-sus | 361           | Ural-2      |         |
| 3 | 1 | 4 | 3 | 3 | 2 | 2 | 5 | 3 | 3 | 2 | 3 | 3 | 2 | 4 | 210 | Others  | new   | ND      | 462           | T1          |         |
| 3 | 1 | 3 | 3 | 3 | 2 | 2 | 5 | 4 | 2 | 2 | 3 | 3 | 2 | 4 | 245 | Others  | new   | Pan-sus | 127           | Ural-2      |         |
| 3 | 1 | 3 | 3 | 2 | 1 | 2 | 5 | 4 | 2 | 2 | 3 | 3 | 2 | 4 | 255 | Hetian  | new   | Pan-sus | 2087          | H3          |         |
| 3 | 1 | 4 | 3 | 3 | 1 | 3 | 4 | 4 | 3 | 2 | 3 | 3 | 2 | 4 | 140 | Akesu   | new   | Pan-sus | 127           | Ural-2      |         |
| 3 | 1 | 4 | 3 | 3 | 1 | 3 | 5 | 4 | 3 | 2 | 3 | 3 | 2 | 4 | 275 | Hetian  | rela  | Pan-sus | 127           | Ural-2      |         |
| 3 | 1 | 4 | 3 | 3 | 1 | 2 | 5 | 4 | 3 | 1 | 3 | 3 | 2 | 4 | 327 | Others  | new   | Pan-sus | 3139          | T3          |         |
| 3 | 1 | 4 | 3 | 3 | 2 | 2 | 4 | 4 | 3 | 2 | 4 | 3 | 2 | 4 | 99  | Kashgar | new   | Pan-sus | 127           | Ural-2      |         |
| 3 | 1 | 4 | 0 | 2 | 2 | 2 | 4 | 4 | 3 | 2 | 2 | 3 | 2 | 4 | 228 | Hetian  | new   | Pan-sus | Orphan or New | Not defined |         |
| 3 | 1 | 4 | 3 | 2 | 2 | 3 | 4 | 4 | 3 | 2 | 3 | 5 | 2 | 4 | 222 | Kashgar | new   | Pan-sus | 127           | Ural-2      |         |
| 2 | 1 | 4 | 3 | 3 | 1 | 2 | 5 | 4 | 3 | 2 | 3 | 5 | 2 | 4 | 256 | Hetian  | rela  | Pan-sus | 127           | Ural-2      |         |
| 2 | 1 | 4 | 3 | 3 | 1 | 2 | 5 | 4 | 2 | 2 | 3 | 8 | 2 | 6 | 332 | Hetian  | new   | S       | 127           | Ural-2      |         |
| 2 | 1 | 4 | 3 | 2 | 1 | 3 | 5 | 4 | 3 | 2 | 3 | 6 | 2 | 4 | 292 | Hetian  | rela  | Pan-sus | 127           | Ural-2      |         |
| 2 | 1 | 4 | 3 | 3 | 1 | 2 | 4 | 5 | 2 | 2 | 3 | 3 | 2 | 4 | 249 | Hetian  | rela  | Pan-sus | 127           | Ural-2      |         |
| 2 | 1 | 4 | 3 | 3 | 1 | 2 | 4 | 5 | 2 | 2 | 4 | 3 | 2 | 5 | 251 | Akesu   | new   | Pan-sus | 127           | Ural-2      |         |
| 3 | 1 | 4 | 3 | 2 | 1 | 2 | 4 | 4 | 2 | 2 | 3 | 3 | 2 | 4 | 173 | Hetian  | rela  | IR      | 127           | Ural-2      |         |
| 2 | 1 | 4 | 3 | 2 | 1 | 2 | 4 | 4 | 2 | 2 | 3 | 3 | 2 | 4 | 205 | Akesu   | new   | Pan-sus | 127           | Ural-2      |         |
| 3 | 1 | 4 | 3 | 2 | 1 | 2 | 1 | 5 | 2 | 2 | 1 | 3 | 2 | 5 | 215 | Akesu   | new   | Pan-sus | Orphan or New | Not defined |         |
| 2 | 1 | 4 | 3 | 3 | 2 | 3 | 4 | 5 | 3 | 2 | 3 | 3 | 2 | 4 | 34  | Akesu   | rela  | Pan-sus | 127           | Ural-2      |         |
| 2 | 1 | 4 | 3 | 3 | 2 | 3 | 4 | 5 | 1 | 2 | 3 | 5 | 2 | 4 | 184 | Kashgar | rela  | RS      | Orphan or New | Not defined |         |
| 3 | 1 | 4 | 3 | 2 | 2 | 1 | 4 | 5 | 3 | 2 | 3 | 3 | 2 | 4 | 291 | Akesu   | rela  | IRS     | 1626          | T1          |         |
| 2 | 1 | 4 | 3 | 3 | 1 | 3 | 4 | 5 | 2 | 1 | 3 | 2 | 2 | 4 | 346 | Akesu   | rela  | ND      | Orphan or New | Not defined |         |
| 3 | 3 | 4 | 3 | 3 | 2 | 3 | 5 | 5 | 3 | 2 | 4 | 5 | 2 | 4 | 116 | Kashgar | new   | Pan-sus | 127           | Ural-2      |         |
| 3 | 1 | 4 | 3 | 3 | 2 | 3 | 5 | 5 | 2 | 2 | 4 | 8 | 2 | 4 | 164 | Hetian  | rela  | IRS     | 127           | Ural-2      |         |
| 3 | 1 | 4 | 3 | 2 | 2 | 3 | 5 | 7 | 3 | 2 | 4 | 6 | 2 | 4 | 2   | Kashgar | new   | ND      | 127           | Ural-2      |         |
| 3 | 1 | 4 | 3 | 3 | 2 | 2 | 5 | 5 | 2 | 2 | 3 | 3 | 2 | 4 | 163 | Others  | new   | IS      | 127           | Ural-2      |         |
| 3 | 1 | 4 | 3 | 3 | 2 | 3 | 5 | 5 | 3 | 2 | 3 | 3 | 2 | 4 | 283 | Hetian  | rela  | RSE     | 127           | Ural-2      |         |
| 3 | 1 | 4 | 3 | 3 | 1 | 3 | 5 | 9 | 2 | 2 | 3 | 3 | 2 | 4 | 16  | Kashgar | rela  | ND      | 127           | Ural-2      |         |
| 3 | 1 | 4 | 3 | 3 | 1 | 3 | 5 | 4 | 2 | 2 | 3 | 3 | 2 | 4 | 27  | Akesu   | new   | Pan-sus | Orphan or New | Unknown     |         |
| 3 | 1 | 4 | 3 | 2 | 1 | 3 | 5 | 5 | 2 | 2 | 3 | 5 | 2 | 4 | 341 | Akesu   | rela  | ND      | 127           | Ural-2      |         |
| 3 | 1 | 3 | 3 | 3 | 2 | 3 | 4 | 4 | 3 | 2 | 3 | 5 | 2 | 4 | 28  | Akesu   | new   | Pan-sus | 127           | Ural-2      |         |
| 3 | 1 | 3 | 3 | 3 | 2 | 3 | 5 | 4 | 3 | 2 | 3 | 0 | 2 | 4 | 38  | Akesu   | new   | I       | 127           | Ural-2      |         |
| 3 | 1 | 3 | 3 | 3 | 1 | 3 | 5 | 5 | 3 | 2 | 3 | 5 | 2 | 6 | 25  | Akesu   | rela  | Pan-sus | 127           | Ural-2      |         |
| 3 | 1 | 3 | 3 | 3 | 2 | 3 | 5 | 5 | 3 | 2 | 3 | 5 | 2 | 4 | 41  | Akesu   | rela  | I       | 127           | Ural-2      |         |
| 3 | 1 | 0 | 2 | 2 | 2 | 0 | 5 | 4 | 1 | 2 | 3 | 3 | 2 | 4 | 211 | Akesu   | new   | Pan-sus | Orphan or New | Not defined |         |
| 3 | 1 | 2 | 3 | 4 | 2 | 2 | 5 | 6 | 1 | 2 | 3 | 2 | 2 | 4 | 246 | Akesu   | rela  | Pan-sus | 78            | T           |         |
| 3 | 1 | 0 | 0 | 3 | 2 | 0 | 0 | 5 | 3 | 2 | 3 | 0 | 2 | 4 | 20  | Akesu   | rela  | Pan-sus | 127           | Ural-2      |         |
| 0 | 1 | 0 | 0 | 3 | 2 | 2 | 5 | 5 | 3 | 2 | 3 | 0 | 2 | 4 | 322 | Hetian  | rela  | Pan-sus | 127           | Ural-2      |         |
| 2 | 2 | 4 | 0 | 3 | 2 | 2 | 6 | 5 | 3 | 2 | 4 | 2 | 2 | 4 | 250 | Others  | new   | Pan-sus | 602           | Unknown     |         |
| 3 | 1 | 4 | 0 | 5 | 2 | 1 | 5 | 6 | 3 | 2 | 6 | 2 | 2 | 4 | 265 | Akesu   | rela  | Pan-sus | 37            | T3          |         |
| 3 | 1 | 5 | 3 | 4 | 2 | 2 | 1 | 5 | 2 | 2 | 4 | 3 | 2 | 4 | 40  | Akesu   | rela  | Pan-sus | 53            | T1          |         |
| 3 | 1 | 5 | 3 | 3 | 2 | 2 | 5 | 4 | 0 | 1 | 3 | 3 | 2 | 3 | 176 | Hetian  | new   | Pan-sus | 53            | T1          |         |
| 3 | 3 | 4 | 3 | 2 | 2 | 2 | 1 | 5 | 3 | 1 | 3 | 5 | 2 | 4 | 92  | Kashgar | new   | Pan-sus | Orphan or New | Unknown     |         |
| 3 | 2 | 4 | 5 | 3 | 1 | 3 | 5 | 3 | 3 | 2 | 2 | 1 | 2 | 2 | 51  | Akesu   | new   | Pan-sus | 515           | T2          |         |
| 3 | 2 | 4 | 3 | 3 | 2 | 3 | 5 | 3 | 2 | 1 | 2 | 1 | 2 | 2 | 66  | Akesu   | new   | Pan-sus | Orphan or New | Unknown     |         |
| 2 | 2 | 4 | 0 | 3 | 1 | 1 | 4 | 3 | 2 | 2 | 2 | 1 | 2 | 2 | 324 | Akesu   | rela  | IS      | 52            | T2          |         |
| 4 | 2 | 4 | 5 | 3 | 2 | 3 | 5 | 4 | 1 | 2 | 2 | 1 | 2 | 4 | 338 | Akesu   | rela  | ND      | 52            | T2          |         |
| 4 | 2 | 4 | 4 | 2 | 1 | 2 | 4 | 4 | 2 | 2 | 1 | 1 | 2 | 2 | 191 | Hetian  | rela  | IRSE    | 888           | T2          |         |

Supplementary Figure S3. Dendrogram based on Spoligotyping and VNTR-15<sub>China</sub> typing data of *Mycobacterium tuberculosis* isolates obtained from southern Xinjiang, China.

Note: Abbreviations in the TYPE column: rela, relapsed patients; in the Susceptibility column: ND, not detected; H, isoniazid; R, rifampicin; S, streptomycin; E, ethambutol; Pan-sus, simultaneously susceptible to H, R, S, E; C, cluster.

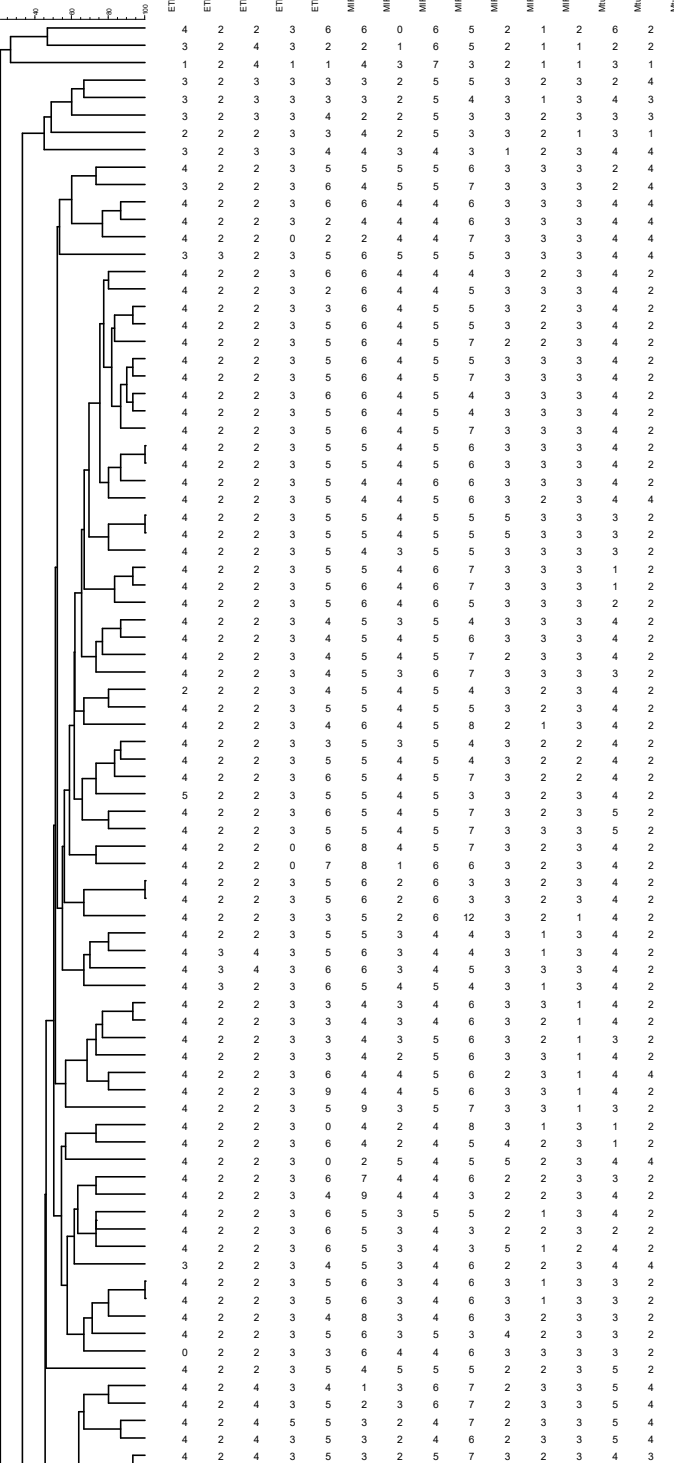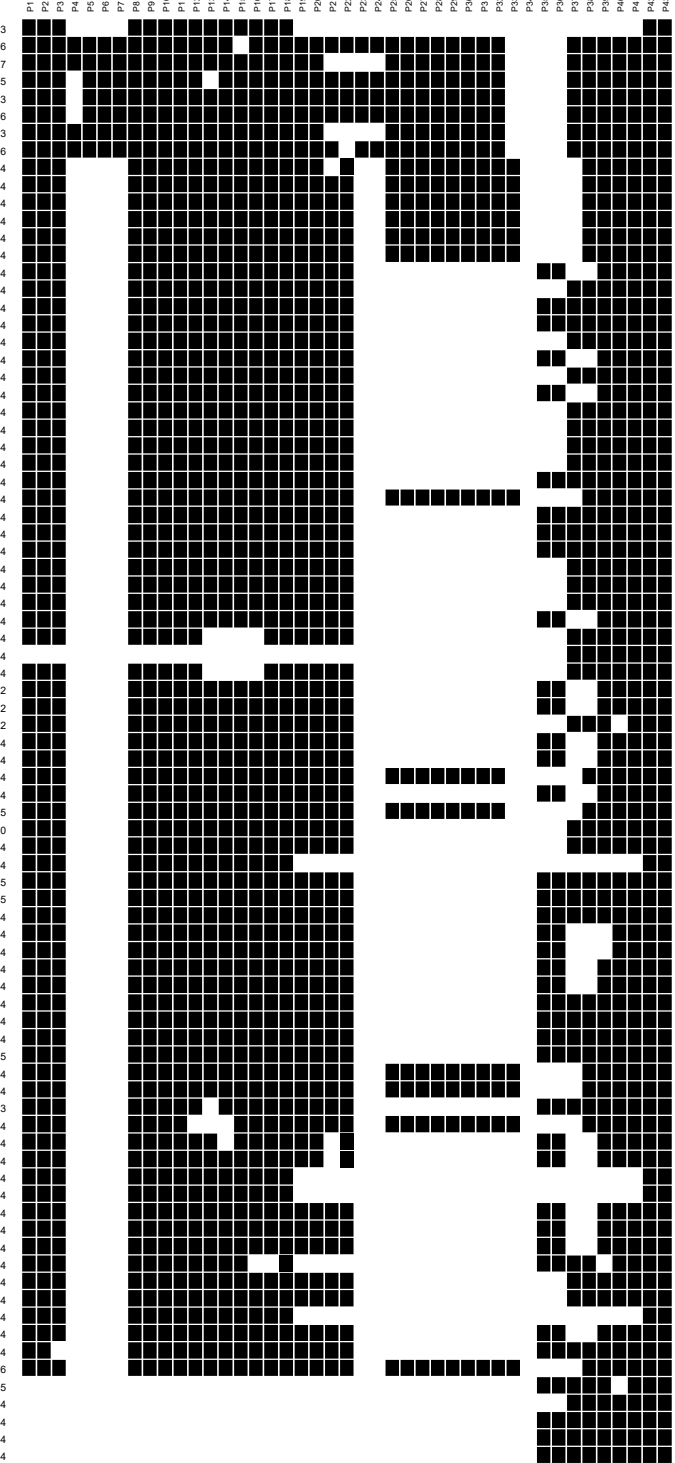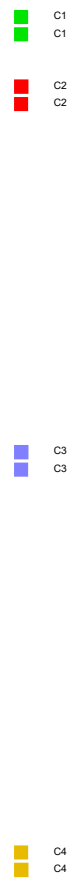

| Key | Region  | TYPE | Susceptibility | SIT           | Lineage     |
|-----|---------|------|----------------|---------------|-------------|
| 143 | Akesu   | new  | I              | Orphan or New | Not defined |
| 217 | Hetian  | new  | Pan-sus        | 118           | T1          |
| 181 | Hetian  | rela | I              | 42            | LAM9        |
| 43  | Akesu   | new  | Pan-sus        | 2052          | T3          |
| 342 | Hetian  | new  | ND             | 205           | T1          |
| 263 | Hetian  | new  | IS             | 205           | T1          |
| 133 | Akesu   | rela | Pan-sus        | 42            | LAM9        |
| 285 | Kashgar | rela | Pan-sus        | 86            | T1          |
| 105 | Kashgar | rela | Pan-sus        | Orphan or New | Not defined |
| 238 | Hetian  | rela | Pan-sus        | 27            | EAI         |
| 214 | Others  | new  | Pan-sus        | 27            | EAI         |
| 302 | Akesu   | rela | Pan-sus        | 27            | EAI         |
| 282 | Hetian  | rela | Pan-sus        | 27            | EAI         |
| 317 | Hetian  | rela | IRE            | 27            | EAI         |
| 79  | Akesu   | new  | Pan-sus        | 25            | CAS1-Delhi  |
| 318 | Hetian  | rela | ND             | 357           | CAS1-Delhi  |
| 48  | Akesu   | new  | IRSE           | 26            | CAS1-Delhi  |
| 56  | Akesu   | rela | I              | 26            | CAS1-Delhi  |
| 335 | Hetian  | rela | IS             | 357           | CAS1-Delhi  |
| 69  | Akesu   | new  | Pan-sus        | 25            | CAS1-Delhi  |
| 316 | Kashgar | rela | IR             | 357           | CAS1-Delhi  |
| 67  | Akesu   | rela | Pan-sus        | 25            | CAS1-Delhi  |
| 295 | Hetian  | rela | IRSE           | 357           | CAS1-Delhi  |
| 114 | Kashgar | new  | IS             | 357           | CAS1-Delhi  |
| 11  | Kashgar | rela | ND             | 357           | CAS1-Delhi  |
| 74  | Akesu   | new  | S              | 357           | CAS1-Delhi  |
| 17  | Kashgar | rela | ND             | 26            | CAS1-Delhi  |
| 62  | Akesu   | new  | Pan-sus        | 27            | EAI         |
| 37  | Akesu   | new  | Pan-sus        | 26            | CAS1-Delhi  |
| 46  | Akesu   | rela | Pan-sus        | 26            | CAS1-Delhi  |
| 55  | Akesu   | rela | IRSE           | 26            | CAS1-Delhi  |
| 110 | Kashgar | rela | S              | 357           | CAS1-Delhi  |
| 111 | Kashgar | new  | S              | 357           | CAS1-Delhi  |
| 195 | Akesu   | new  | Pan-sus        | 357           | CAS1-Delhi  |
| 231 | Hetian  | new  | Pan-sus        | 25            | CAS1-Delhi  |
| 233 | Hetian  | new  | Pan-sus        | Orphan or New | Not defined |
| 10  | Kashgar | rela | ND             | 269           | Beijing     |
| 278 | Hetian  | new  | Pan-sus        | Orphan or New | Not defined |
| 12  | Kashgar | rela | ND             | 25            | CAS1-Delhi  |
| 72  | Akesu   | new  | Pan-sus        | 25            | CAS1-Delhi  |
| 18  | Kashgar | rela | ND             | 876           | CAS         |
| 141 | Akesu   | new  | Pan-sus        | 25            | CAS1-Delhi  |
| 142 | Akesu   | rela | Pan-sus        | 25            | CAS1-Delhi  |
| 272 | Kashgar | rela | Pan-sus        | Orphan or New | T1          |
| 267 | Kashgar | rela | ND             | 25            | CAS1-Delhi  |
| 253 | Akesu   | new  | Pan-sus        | Orphan or New | T1          |
| 287 | Akesu   | rela | I              | 357           | CAS1-Delhi  |
| 96  | Kashgar | new  | S              | 357           | CAS1-Delhi  |
| 329 | Others  | new  | Pan-sus        | Orphan or New | Not defined |
| 22  | Akesu   | rela | Pan-sus        | 26            | CAS1-Delhi  |
| 24  | Akesu   | new  | I              | 26            | CAS1-Delhi  |
| 331 | Hetian  | new  | Pan-sus        | 26            | CAS1-Delhi  |
| 75  | Akesu   | new  | Pan-sus        | 381           | CAS1-Delhi  |
| 127 | Akesu   | new  | I              | 381           | CAS1-Delhi  |
| 83  | Kashgar | rela | I              | 25            | CAS1-Delhi  |
| 80  | Akesu   | new  | Pan-sus        | 25            | CAS1-Delhi  |
| 216 | Hetian  | rela | I              | 26            | CAS1-Delhi  |
| 266 | Hetian  | rela | Pan-sus        | 26            | CAS1-Delhi  |
| 115 | Kashgar | rela | Pan-sus        | 26            | CAS1-Delhi  |
| 315 | Hetian  | rela | Pan-sus        | 26            | CAS1-Delhi  |
| 106 | Kashgar | rela | Pan-sus        | 27            | EAI         |
| 151 | Akesu   | new  | Pan-sus        | 27            | EAI         |
| 103 | Kashgar | rela | RS             | Orphan or New | Not defined |
| 221 | Kashgar | new  | ND             | Orphan or New | Not defined |
| 326 | Others  | new  | ND             | Orphan or New | Not defined |
| 230 | Kashgar | rela | I              | 1203          | CAS1-Delhi  |
| 199 | Akesu   | rela | Pan-sus        | Orphan or New | Not defined |
| 281 | Hetian  | rela | I              | Orphan or New | Not defined |
| 158 | Akesu   | new  | Pan-sus        | 25            | CAS1-Delhi  |
| 204 | Akesu   | new  | Pan-sus        | 25            | CAS1-Delhi  |
| 321 | Akesu   | new  | Pan-sus        | 25            | CAS1-Delhi  |
| 276 | Others  | rela | Pan-sus        | Orphan or New | Not defined |
| 100 | Kashgar | rela | IS             | 357           | CAS1-Delhi  |
| 101 | Kashgar | new  | S              | 357           | CAS1-Delhi  |
| 227 | Akesu   | rela | Pan-sus        | Orphan or New | Not defined |
| 254 | Kashgar | new  | Pan-sus        | 25            | CAS1-Delhi  |
| 284 | Others  | new  | R              | 952           | CAS1-Delhi  |
| 4   | Kashgar | rela | ND             | 27            | EAI         |
| 14  | Kashgar | rela | ND             | 190           | Beijing     |
| 311 | Others  | new  | ND             | 269           | Beijing     |
| 109 | Kashgar | rela | Pan-sus        | 1             | Beijing     |
| 308 | Kashgar | rela | ND             | 1             | Beijing     |
| 98  | Kashgar | new  | S              | 1             | Beijing     |



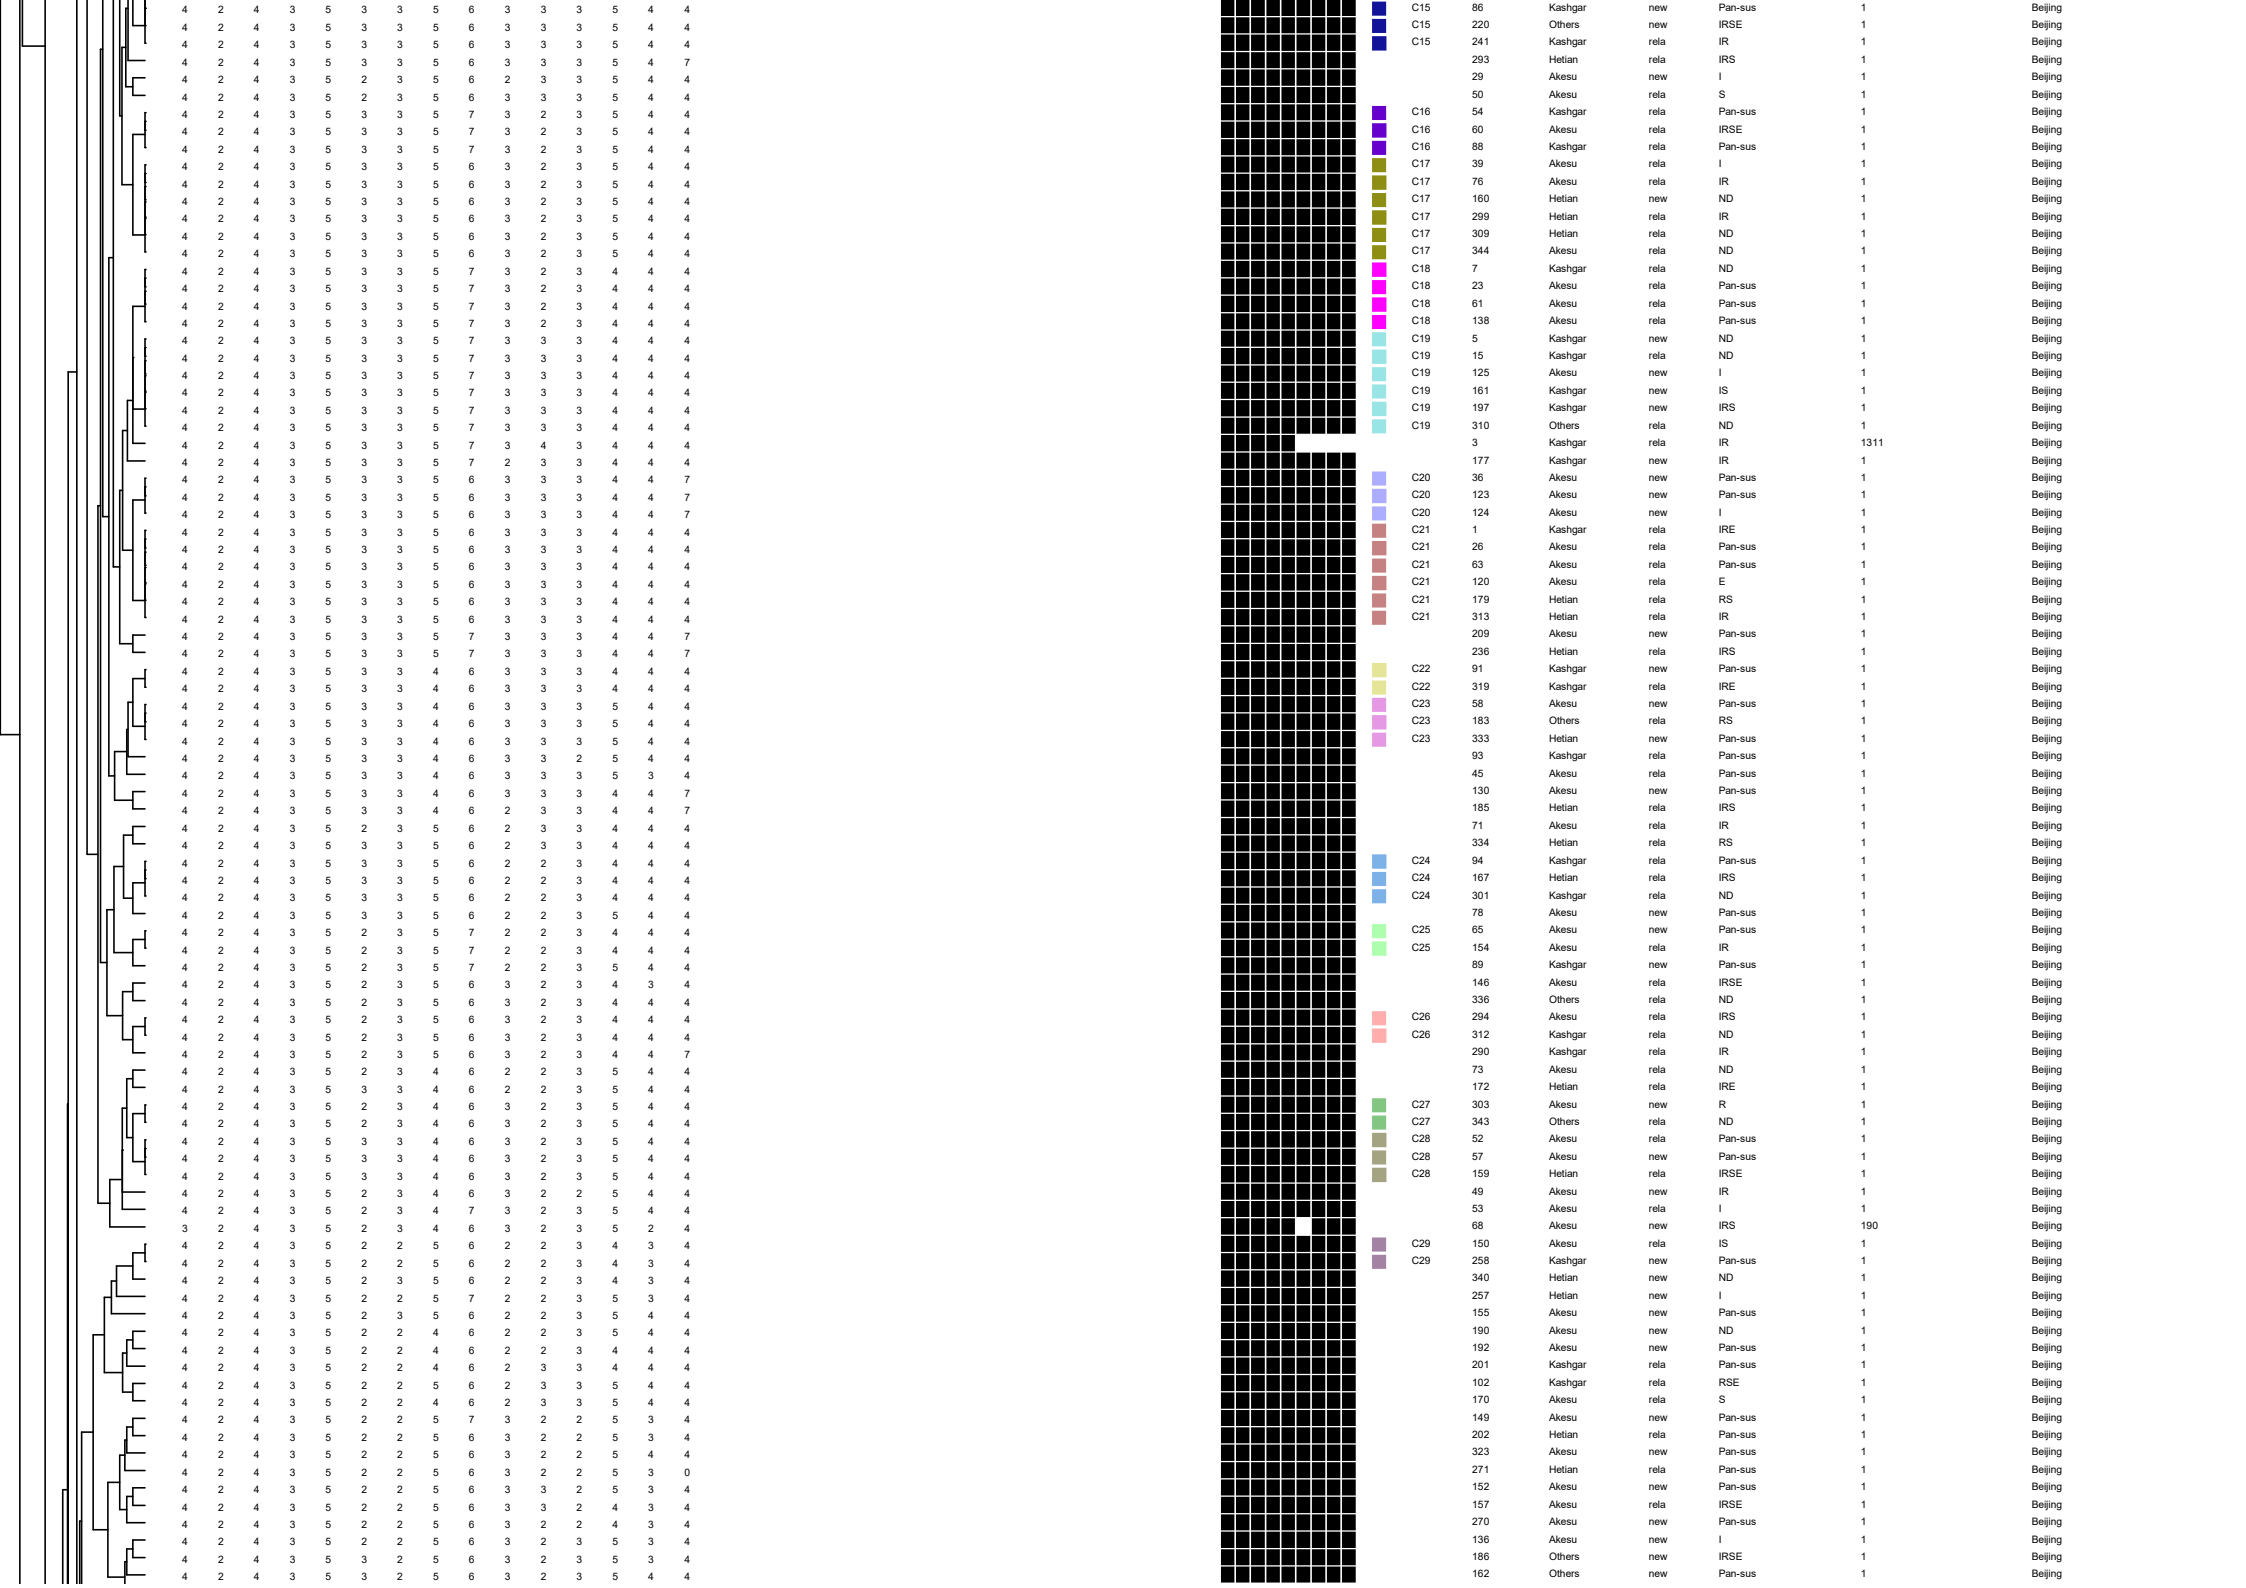

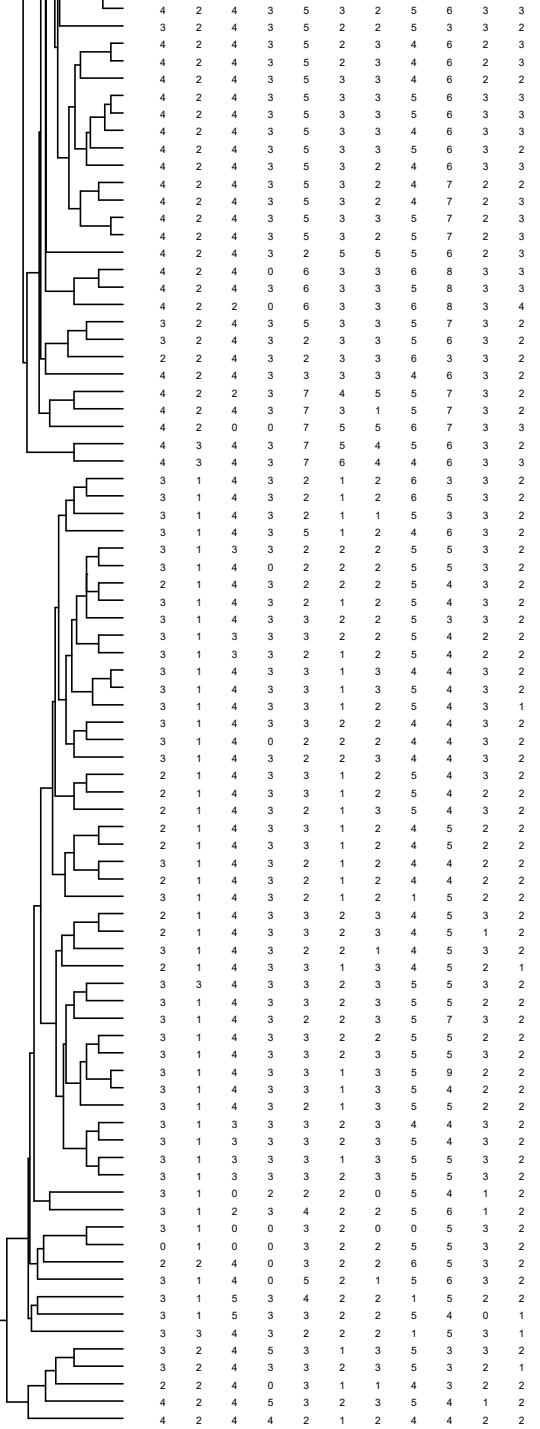

|   |   |   |   |   |   |   |   |   |   |   |   |   |   |   |
|---|---|---|---|---|---|---|---|---|---|---|---|---|---|---|
| 4 | 2 | 4 | 3 | 5 | 3 | 2 | 5 | 6 | 3 | 3 | 3 | 5 | 3 | 4 |
| 3 | 2 | 4 | 3 | 5 | 2 | 2 | 5 | 3 | 3 | 2 | 2 | 4 | 4 | 4 |
| 4 | 2 | 4 | 3 | 5 | 2 | 3 | 4 | 6 | 2 | 3 | 2 | 4 | 3 | 4 |
| 4 | 2 | 4 | 3 | 5 | 2 | 3 | 4 | 6 | 2 | 3 | 2 | 4 | 4 | 4 |
| 4 | 2 | 4 | 3 | 5 | 3 | 3 | 4 | 6 | 2 | 2 | 2 | 5 | 3 | 4 |
| 4 | 2 | 4 | 3 | 5 | 3 | 3 | 5 | 6 | 3 | 3 | 2 | 4 | 4 | 4 |
| 4 | 2 | 4 | 3 | 5 | 3 | 3 | 5 | 6 | 3 | 3 | 2 | 4 | 4 | 4 |
| 4 | 2 | 4 | 3 | 5 | 3 | 3 | 4 | 6 | 3 | 3 | 2 | 4 | 4 | 4 |
| 4 | 2 | 4 | 3 | 5 | 3 | 3 | 5 | 6 | 3 | 2 | 2 | 4 | 3 | 4 |
| 4 | 2 | 4 | 3 | 5 | 3 | 2 | 4 | 6 | 3 | 3 | 2 | 4 | 3 | 4 |
| 4 | 2 | 4 | 3 | 5 | 3 | 2 | 4 | 7 | 2 | 2 | 2 | 3 | 4 | 4 |
| 4 | 2 | 4 | 3 | 5 | 3 | 2 | 4 | 7 | 2 | 3 | 2 | 4 | 4 | 4 |
| 4 | 2 | 4 | 3 | 5 | 3 | 3 | 5 | 7 | 2 | 3 | 2 | 4 | 3 | 4 |
| 4 | 2 | 4 | 3 | 5 | 3 | 2 | 5 | 7 | 2 | 3 | 2 | 4 | 3 | 4 |
| 4 | 2 | 4 | 3 | 2 | 5 | 5 | 5 | 6 | 2 | 3 | 3 | 4 | 4 | 4 |
| 4 | 2 | 4 | 0 | 6 | 3 | 3 | 6 | 8 | 3 | 3 | 3 | 5 | 4 | 4 |
| 4 | 2 | 4 | 3 | 6 | 3 | 3 | 5 | 8 | 3 | 3 | 3 | 5 | 4 | 4 |
| 4 | 2 | 2 | 0 | 6 | 3 | 3 | 6 | 8 | 3 | 4 | 3 | 4 | 4 | 4 |
| 3 | 2 | 4 | 3 | 5 | 3 | 3 | 5 | 7 | 3 | 2 | 3 | 4 | 2 | 4 |
| 3 | 2 | 4 | 3 | 2 | 3 | 3 | 5 | 6 | 3 | 2 | 3 | 5 | 2 | 4 |
| 2 | 2 | 4 | 3 | 2 | 3 | 3 | 6 | 3 | 3 | 2 | 3 | 2 | 2 | 4 |
| 4 | 2 | 4 | 3 | 3 | 3 | 3 | 4 | 6 | 3 | 2 | 3 | 2 | 4 | 3 |
| 4 | 2 | 2 | 3 | 7 | 4 | 5 | 5 | 7 | 3 | 2 | 3 | 4 | 4 | 4 |
| 4 | 2 | 4 | 3 | 7 | 3 | 1 | 5 | 7 | 3 | 2 | 3 | 5 | 4 | 4 |
| 4 | 2 | 0 | 0 | 7 | 5 | 5 | 6 | 7 | 3 | 3 | 3 | 4 | 4 | 4 |
| 4 | 3 | 4 | 3 | 7 | 5 | 4 | 5 | 6 | 3 | 2 | 2 | 5 | 4 | 4 |
| 4 | 3 | 4 | 3 | 7 | 6 | 4 | 4 | 6 | 3 | 3 | 2 | 4 | 4 | 4 |
| 3 | 1 | 4 | 3 | 2 | 1 | 2 | 6 | 3 | 3 | 2 | 4 | 2 | 2 | 4 |
| 3 | 1 | 4 | 3 | 2 | 1 | 2 | 6 | 5 | 3 | 2 | 3 | 3 | 2 | 4 |
| 3 | 1 | 4 | 3 | 2 | 1 | 1 | 5 | 3 | 3 | 2 | 2 | 2 | 2 | 4 |
| 3 | 1 | 4 | 3 | 5 | 1 | 2 | 4 | 6 | 3 | 2 | 2 | 3 | 2 | 4 |
| 3 | 1 | 3 | 3 | 2 | 2 | 2 | 5 | 5 | 3 | 2 | 3 | 3 | 2 | 4 |
| 3 | 1 | 4 | 0 | 2 | 2 | 2 | 5 | 5 | 3 | 2 | 3 | 3 | 2 | 4 |
| 2 | 1 | 4 | 3 | 2 | 2 | 2 | 5 | 4 | 3 | 2 | 3 | 3 | 2 | 4 |
| 3 | 1 | 4 | 3 | 2 | 1 | 2 | 5 | 4 | 3 | 2 | 3 | 3 | 2 | 4 |
| 3 | 1 | 4 | 3 | 3 | 2 | 2 | 5 | 3 | 3 | 2 | 3 | 3 | 2 | 4 |
| 3 | 1 | 3 | 3 | 3 | 2 | 2 | 5 | 4 | 2 | 2 | 3 | 3 | 2 | 4 |
| 3 | 1 | 3 | 3 | 2 | 1 | 2 | 5 | 4 | 2 | 2 | 3 | 3 | 2 | 4 |
| 3 | 1 | 4 | 3 | 3 | 1 | 3 | 4 | 4 | 3 | 2 | 3 | 3 | 2 | 4 |
| 3 | 1 | 4 | 3 | 3 | 1 | 3 | 5 | 4 | 3 | 2 | 3 | 3 | 2 | 4 |
| 3 | 1 | 4 | 3 | 3 | 1 | 2 | 5 | 4 | 3 | 1 | 3 | 3 | 2 | 4 |
| 3 | 1 | 4 | 3 | 3 | 2 | 2 | 4 | 4 | 3 | 2 | 4 | 3 | 2 | 4 |
| 3 | 1 | 4 | 3 | 3 | 2 | 2 | 4 | 4 | 3 | 2 | 2 | 3 | 2 | 4 |
| 3 | 1 | 4 | 3 | 3 | 2 | 2 | 4 | 4 | 3 | 2 | 2 | 3 | 2 | 4 |
| 3 | 1 | 4 | 3 | 3 | 1 | 2 | 5 | 4 | 2 | 2 | 3 | 8 | 2 | 4 |
| 2 | 1 | 4 | 3 | 3 | 1 | 2 | 4 | 5 | 2 | 2 | 3 | 3 | 2 | 4 |
| 2 | 1 | 4 | 3 | 3 | 1 | 2 | 4 | 5 | 2 | 2 | 4 | 3 | 2 | 5 |
| 3 | 1 | 4 | 3 | 2 | 1 | 2 | 4 | 4 | 2 | 2 | 3 | 3 | 2 | 4 |
| 2 | 1 | 4 | 3 | 2 | 1 | 2 | 4 | 4 | 2 | 2 | 3 | 3 | 2 | 4 |
| 3 | 1 | 4 | 3 | 2 | 1 | 2 | 1 | 5 | 2 | 2 | 1 | 3 | 2 | 5 |
| 2 | 1 | 4 | 3 | 3 | 2 | 3 | 4 | 5 | 3 | 2 | 3 | 3 | 2 | 4 |
| 3 | 1 | 4 | 3 | 2 | 2 | 1 | 4 | 5 | 3 | 2 | 3 | 3 | 2 | 4 |
| 2 | 1 | 4 | 3 | 3 | 1 | 3 | 4 | 5 | 2 | 1 | 3 | 2 | 2 | 4 |
| 3 | 3 | 4 | 3 | 3 | 2 | 3 | 5 | 5 | 3 | 2 | 4 | 5 | 2 | 4 |
| 3 | 1 | 4 | 3 | 3 | 2 | 3 | 5 | 5 | 2 | 2 | 4 | 8 | 2 | 4 |
| 3 | 1 | 4 | 3 | 2 | 2 | 3 | 5 | 7 | 3 | 2 | 4 | 6 | 2 | 4 |
| 3 | 1 | 4 | 3 | 3 | 2 | 2 | 5 | 5 | 2 | 2 | 3 | 3 | 2 | 4 |
| 3 | 1 | 4 | 3 | 3 | 2 | 3 | 5 | 5 | 3 | 2 | 3 | 3 | 2 | 4 |
| 3 | 1 | 4 | 3 | 3 | 1 | 3 | 5 | 9 | 2 | 2 | 3 | 3 | 2 | 4 |
| 3 | 1 | 4 | 3 | 3 | 1 | 3 | 5 | 4 | 2 | 2 | 3 | 3 | 2 | 4 |
| 3 | 1 | 4 | 3 | 2 | 1 | 3 | 5 | 5 | 2 | 2 | 3 | 5 | 2 | 4 |
| 3 | 1 | 3 | 3 | 3 | 2 | 3 | 4 | 4 | 3 | 2 | 3 | 5 | 2 | 4 |
| 3 | 1 | 3 | 3 | 3 | 2 | 3 | 5 | 4 | 3 | 2 | 3 | 0 | 2 | 4 |
| 3 | 1 | 3 | 3 | 3 | 1 | 3 | 5 | 5 | 3 | 2 | 3 | 5 | 2 | 6 |
| 3 | 1 | 3 | 3 | 3 | 2 | 3 | 5 | 5 | 3 | 2 | 3 | 5 | 2 | 4 |
| 3 | 1 | 0 | 2 | 2 | 2 | 0 | 5 | 4 | 1 | 2 | 3 | 3 | 2 | 4 |
| 3 | 1 | 2 | 3 | 4 | 2 | 2 | 5 | 6 | 1 | 2 | 3 | 2 | 2 | 4 |
| 3 | 1 | 0 | 0 | 3 | 2 | 0 | 0 | 5 | 3 | 2 | 3 | 0 | 2 | 4 |
| 0 | 1 | 0 | 0 | 3 | 2 | 2 | 5 | 5 | 3 | 2 | 3 | 0 | 2 | 4 |
| 2 | 2 | 4 | 0 | 3 | 2 | 2 | 6 | 5 | 3 | 2 | 4 | 2 | 2 | 4 |
| 3 | 1 | 4 | 0 | 5 | 2 | 1 | 5 | 6 | 3 | 2 | 6 | 2 | 2 | 4 |
| 3 | 1 | 5 | 3 | 4 | 2 | 2 | 1 | 5 | 2 | 2 | 4 | 3 | 2 | 4 |
| 3 | 1 | 5 | 3 | 3 | 2 | 2 | 5 | 4 | 0 | 1 | 3 | 3 | 2 | 3 |
| 3 | 3 | 4 | 3 | 2 | 2 | 2 | 1 | 5 | 3 | 1 | 3 | 5 | 2 | 4 |
| 3 | 2 | 4 | 5 | 3 | 1 | 3 | 5 | 3 | 3 | 2 | 2 | 1 | 2 | 2 |
| 3 | 2 | 4 | 3 | 3 | 2 | 3 | 5 | 3 | 2 | 1 | 2 | 1 | 2 | 2 |
| 2 | 2 | 4 | 0 | 3 | 1 | 1 | 4 | 3 | 2 | 2 | 2 | 1 | 2 | 2 |
| 4 | 2 | 4 | 5 | 3 | 2 | 3 | 5 | 4 | 1 | 2 | 2 | 1 | 2 | 4 |
| 4 | 2 | 4 | 4 | 2 | 1 | 2 | 4 | 4 | 2 | 2 | 1 | 1 | 2 | 2 |

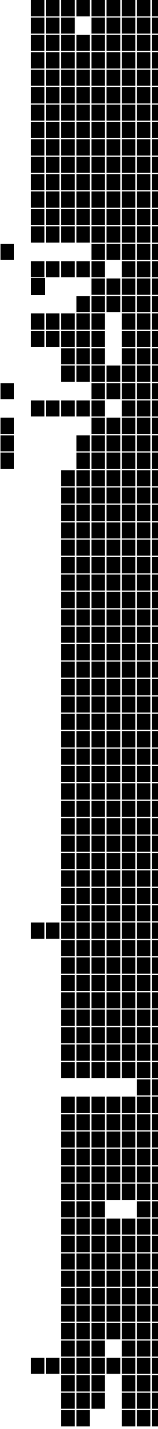

|     |         |      |         |               |             |
|-----|---------|------|---------|---------------|-------------|
| 274 | Akesu   | rela | Pan-sus | 1             | Beijing     |
| 135 | Akesu   | new  | Pan-sus | 632           | Beijing     |
| 108 | Kashgar | rela | Pan-sus | 1             | Beijing     |
| 239 | Akesu   | new  | IRS     | 1             | Beijing     |
| 240 | Hetian  | new  | IRS     | 1             | Beijing     |
| 122 | Akesu   | rela | Pan-sus | 1             | Beijing     |
| 273 | Hetian  | new  | S       | 1             | Beijing     |
| 244 | Akesu   | rela | Pan-sus | 1             | Beijing     |
| 337 | Akesu   | new  | ND      | 1             | Beijing     |
| 117 | Kashgar | rela | Pan-sus | 1             | Beijing     |
| 113 | Kashgar | rela | S       | 1             | Beijing     |
| 243 | Akesu   | rela | Pan-sus | 1             | Beijing     |
| 112 | Kashgar | new  | Pan-sus | 1             | Beijing     |
| 339 | Akesu   | rela | ND      | 1             | Beijing     |
| 85  | Kashgar | new  | Pan-sus | Orphan or New | Unknown     |
| 166 | Hetian  | rela | IS      | 190           | Beijing     |
| 182 | Kashgar | rela | IS      | 1162          | Beijing     |
| 330 | Hetian  | new  | IS      | Orphan or New | Not defined |
| 153 | Akesu   | rela | IRSE    | 190           | Beijing     |
| 307 | Akesu   | rela | ND      | 190           | Beijing     |
| 32  | Akesu   | new  | Pan-sus | Orphan or New | T2          |
| 171 | Kashgar | rela | IRS     | 218           | H1          |
| 47  | Akesu   | rela | IR      | Orphan or New | Unknown     |
| 84  | Kashgar | rela | I       | 190           | Beijing     |
| 21  | Akesu   | rela | Pan-sus | Orphan or New | Unknown     |
| 121 | Akesu   | new  | Pan-sus | 27            | EAI         |
| 131 | Akesu   | new  | Pan-sus | 27            | EAI         |
| 156 | Akesu   | new  | Pan-sus | 53            | T1          |
| 229 | Hetian  | new  | Pan-sus | 2087          | H3          |
| 269 | Others  | rela | Pan-sus | Orphan or New | Not defined |
| 268 | Hetian  | new  | Pan-sus | 53            | T1          |
| 44  | Akesu   | new  | I       | 127           | Ural-2      |
| 260 | Akesu   | new  | I       | 127           | Ural-2      |
| 42  | Akesu   | rela | Pan-sus | 127           | Ural-2      |
| 137 | Akesu   | rela | Pan-sus | 361           | Ural-2      |
| 210 | Others  | new  | ND      | 462           | T1          |
| 245 | Others  | new  | Pan-sus | 127           | Ural-2      |
| 255 | Hetian  | new  | Pan-sus | 2087          | H3          |
| 140 | Akesu   | new  | Pan-sus | 127           | Ural-2      |
| 275 | Hetian  | rela | Pan-sus | 127           | Ural-2      |
| 327 | Others  | new  | Pan-sus | 3139          | T3          |
| 99  | Kashgar | new  | Pan-sus | 127           | Ural-2      |
| 228 | Hetian  | new  | Pan-sus | Orphan or New | Not defined |
| 222 | Kashgar | new  | Pan-sus | 127           | Ural-2      |
| 256 | Hetian  | rela | Pan-sus | 127           | Ural-2      |
| 332 | Hetian  | new  | S       | 127           | Ural-2      |
| 292 | Hetian  | rela | Pan-sus | 127           | Ural-2      |
| 249 | Hetian  | rela | Pan-sus | 127           | Ural-2      |
| 251 | Akesu   | new  | Pan-sus | 127           | Ural-2      |
| 173 | Hetian  | rela | IR      | 127           | Ural-2      |
| 205 | Akesu   | new  | Pan-sus | 127           | Ural-2      |
| 215 | Akesu   | new  | Pan-sus | Orphan or New | Not defined |
| 34  | Akesu   | rela | Pan-sus | 127           | Ural-2      |
| 184 | Kashgar | rela | RS      | Orphan or New | Not defined |
| 291 | Akesu   | rela | IRS     | 1626          | T1          |
| 346 | Akesu   | rela | ND      | Orphan or New | Not defined |
| 116 | Kashgar | new  | Pan-sus | 127           | Ural-2      |
| 164 | Hetian  | rela | IRS     | 127           | Ural-2      |
| 2   | Kashgar | new  | ND      | 127           | Ural-2      |
| 163 | Others  | new  | IS      | 127           | Ural-2      |
| 283 | Hetian  | rela | RSE     | 127           | Ural-2      |
| 16  | Kashgar | rela | ND      | 127           | Ural-2      |
| 27  | Akesu   | new  | Pan-sus | Orphan or New | Unknown     |
| 341 | Akesu   | rela | ND      | 127           | Ural-2      |
| 28  | Akesu   | new  | Pan-sus | 127           | Ural-2      |
| 38  | Akesu   | new  | I       | 127           | Ural-2      |
| 25  | Akesu   | rela | Pan-sus | 127           | Ural-2      |
| 41  | Akesu   | rela | I       | 127           | Ural-2      |
| 211 | Akesu   | new  | Pan-sus | Orphan or New | Not defined |
| 246 | Akesu   | rela | Pan-sus | 78            | T           |
| 20  | Akesu   | rela | Pan-sus | 127           | Ural-2      |
| 322 | Hetian  | rela | Pan-sus | 127           | Ural-2      |
| 250 | Others  | new  | Pan-sus | 602           | Unknown     |
| 265 | Akesu   | rela | Pan-sus | 37            | T3          |
| 40  | Akesu   | rela | Pan-sus | 53            | T1          |
| 176 | Hetian  | new  | Pan-sus | 53            | T1          |
| 92  | Kashgar | new  | Pan-sus | Orphan or New | Unknown     |
| 51  | Akesu   | new  | Pan-sus | 515           | T2          |
| 66  | Akesu   | new  | Pan-sus | Orphan or New | Unknown     |
| 324 | Akesu   | rela | IS      | 52            | T2          |
| 338 | Akesu   | rela | ND      | 52            | T2          |
| 191 | Hetian  | rela | IRSE    | 888           | T2          |
